# Supplementary material for: Highly regioselective synthesis of 4-tosylthiomorpholine via intramolecular cyclization of N-tethered thioalkenols
Source: Royal Society of Chemistry journal article supplement (doi:10.1039/c6ob01869f), 2016-01-01

**Supporting Information**

**Highly Regioselective Synthesis of 4-Tosylthiomorpholine via Intramolecular  
Cyclization of *N*-Tethered Thioalkenols**

**Anil K. Saikia,\* Manash J. Deka and Upasana Borthakur**

**Contents:**

|                                                                |               |
|----------------------------------------------------------------|---------------|
| 1. <sup>1</sup> H and <sup>13</sup> C Spectra of all compounds | <b>S2-S22</b> |
|----------------------------------------------------------------|---------------|

# $^1\text{H}$ and $^{13}\text{C}$ Spectra of compound **1b**

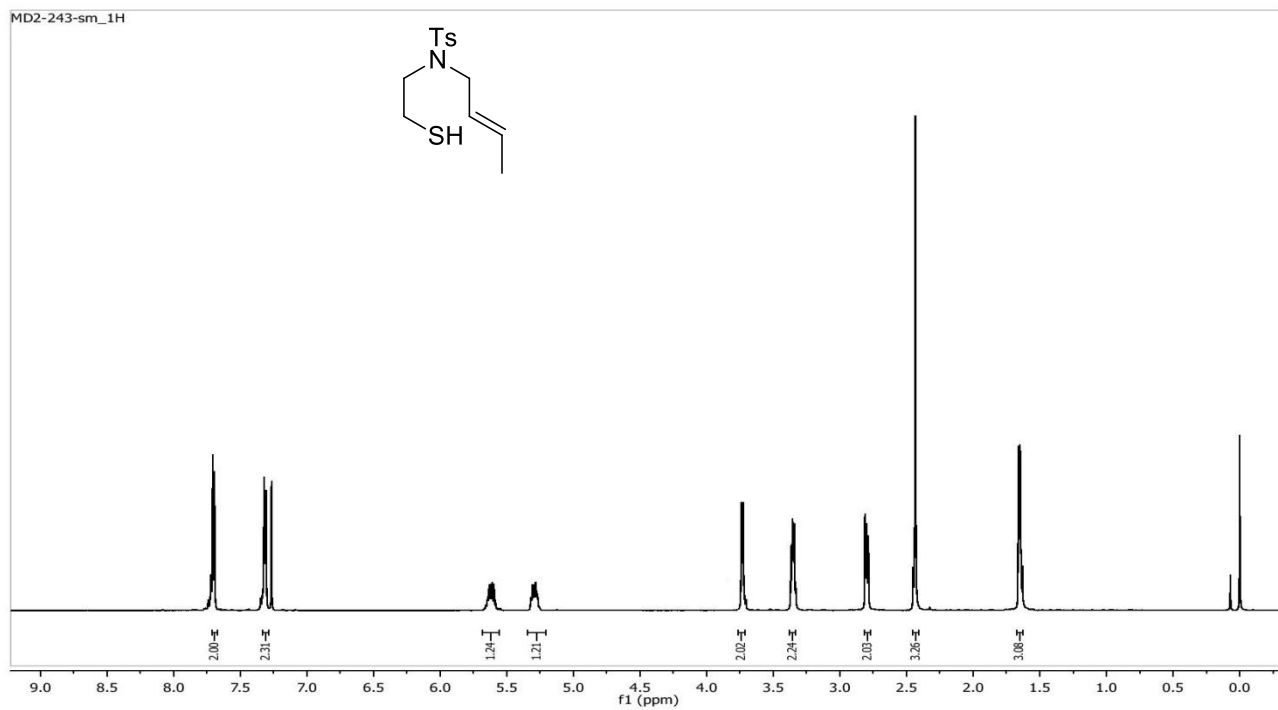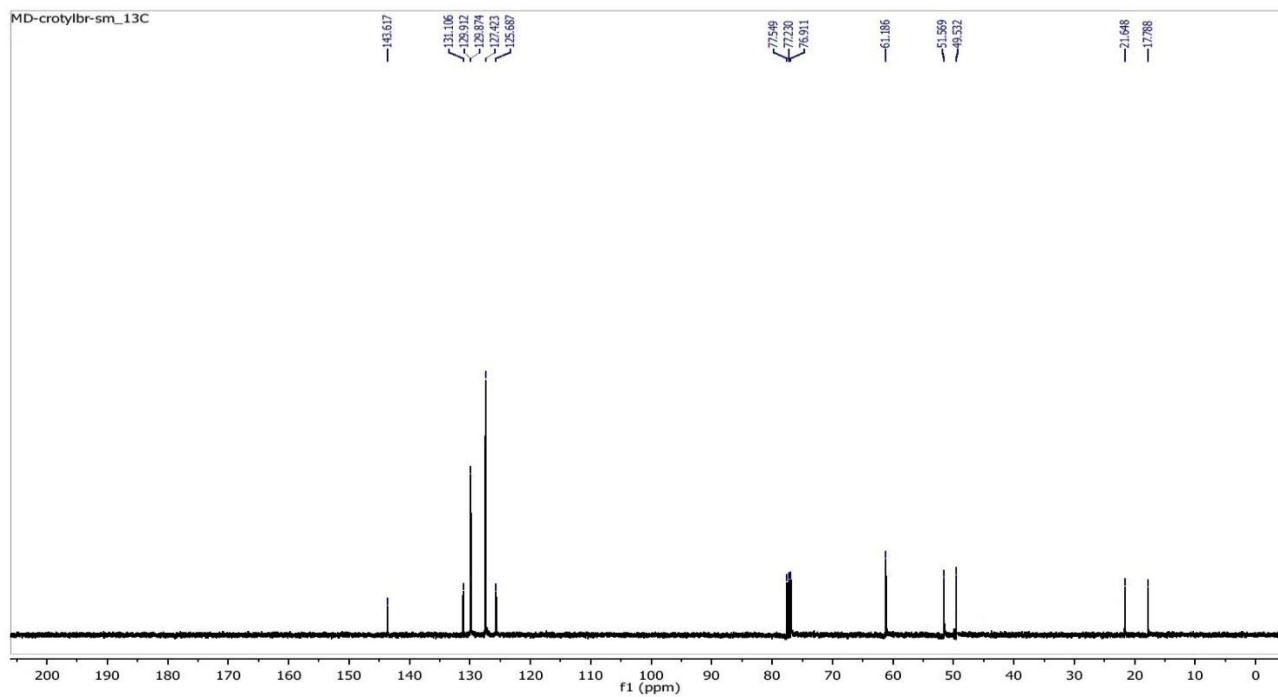

# <sup>1</sup>H and <sup>13</sup>C Spectra of compound **1d**

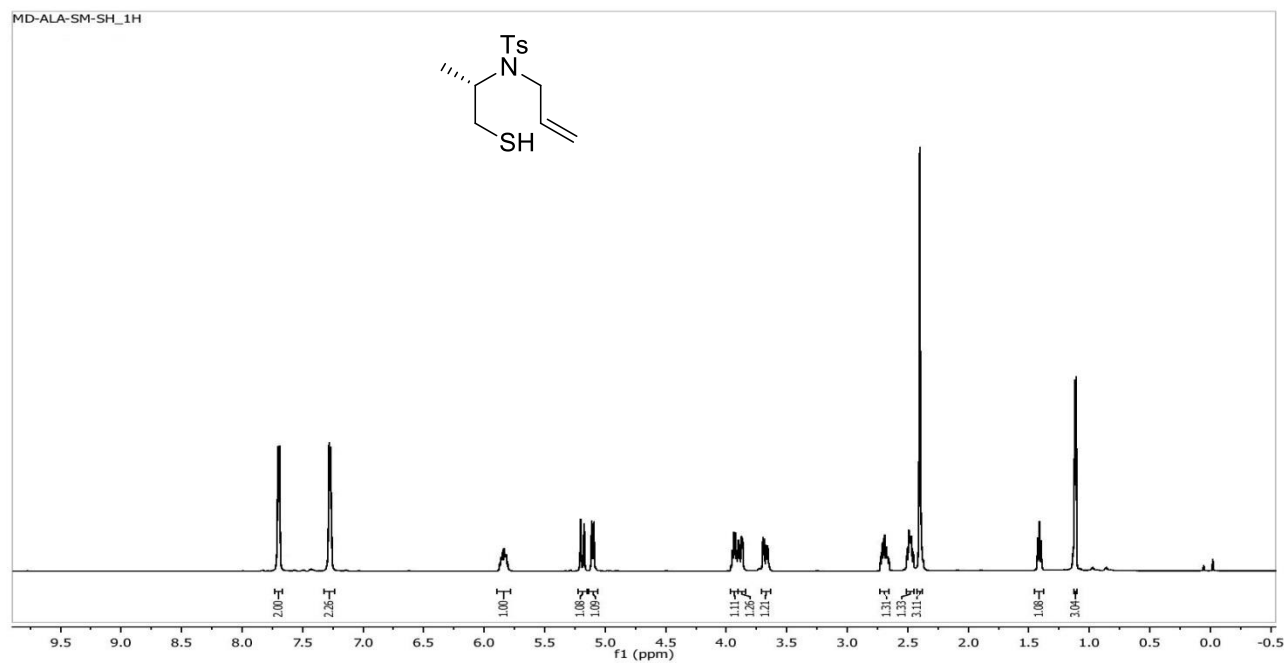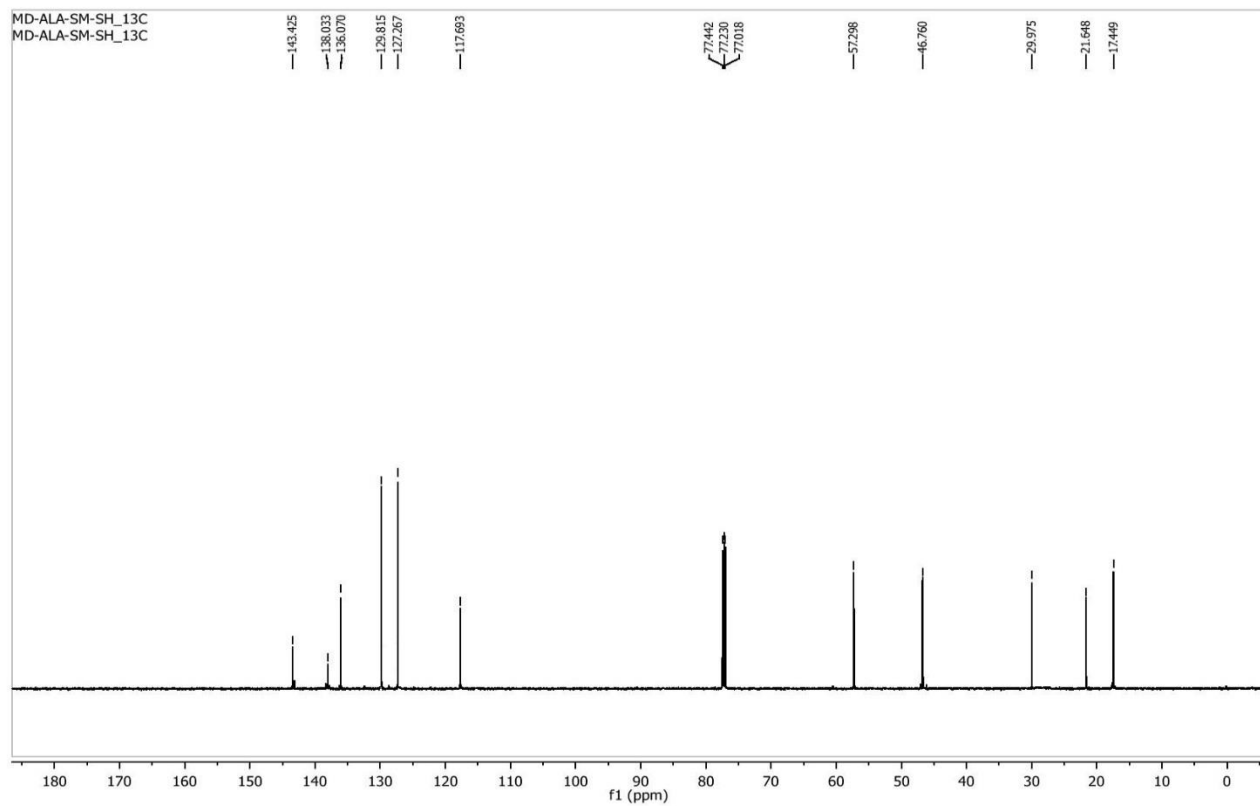

# $^1\text{H}$ and $^{13}\text{C}$ Spectra of compound **1f**

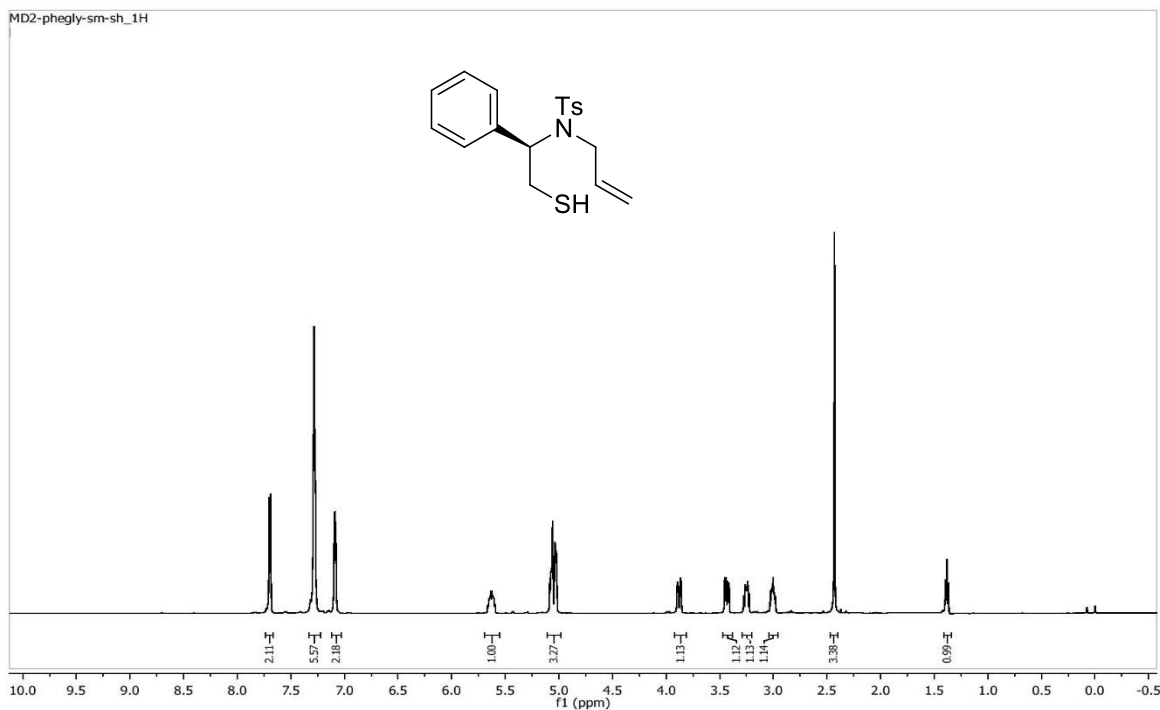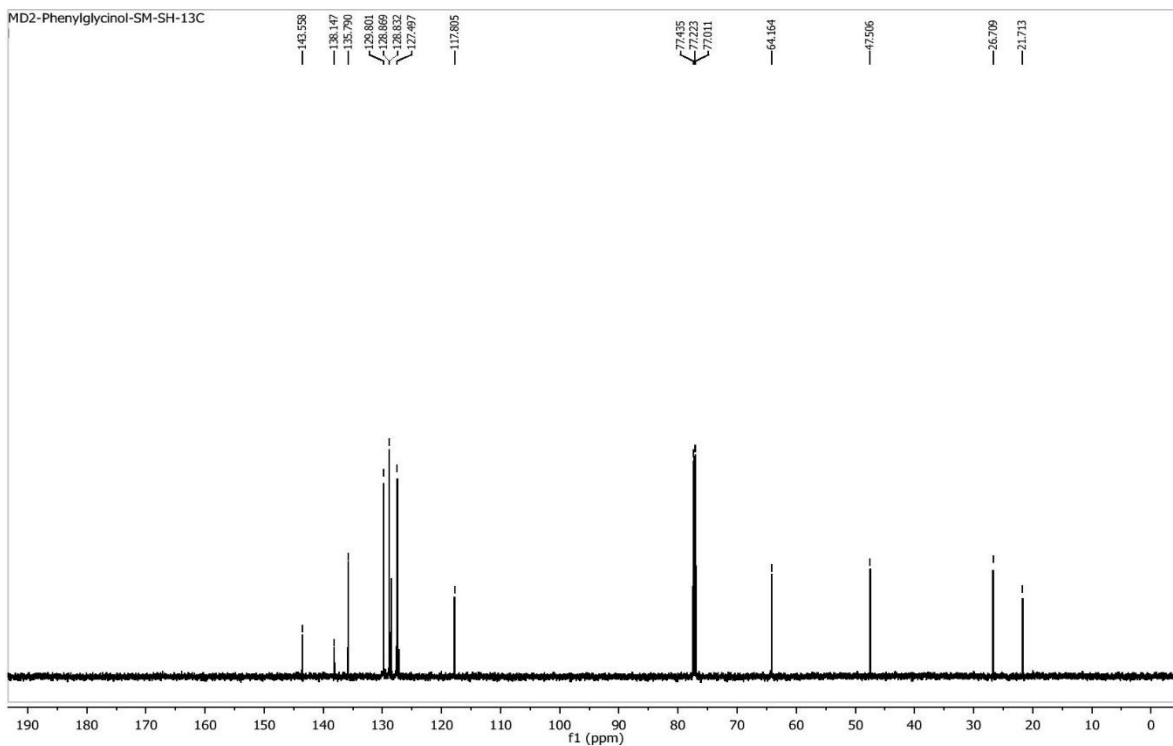

# $^1\text{H}$ and $^{13}\text{C}$ Spectra of compound **1g**

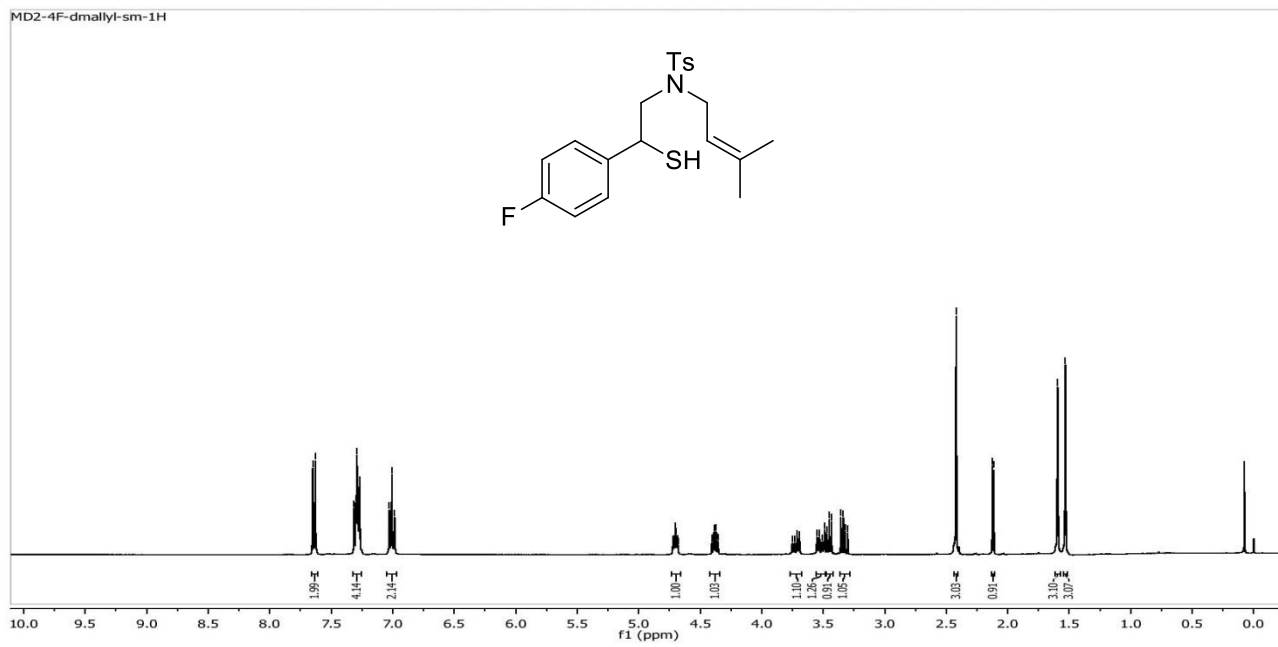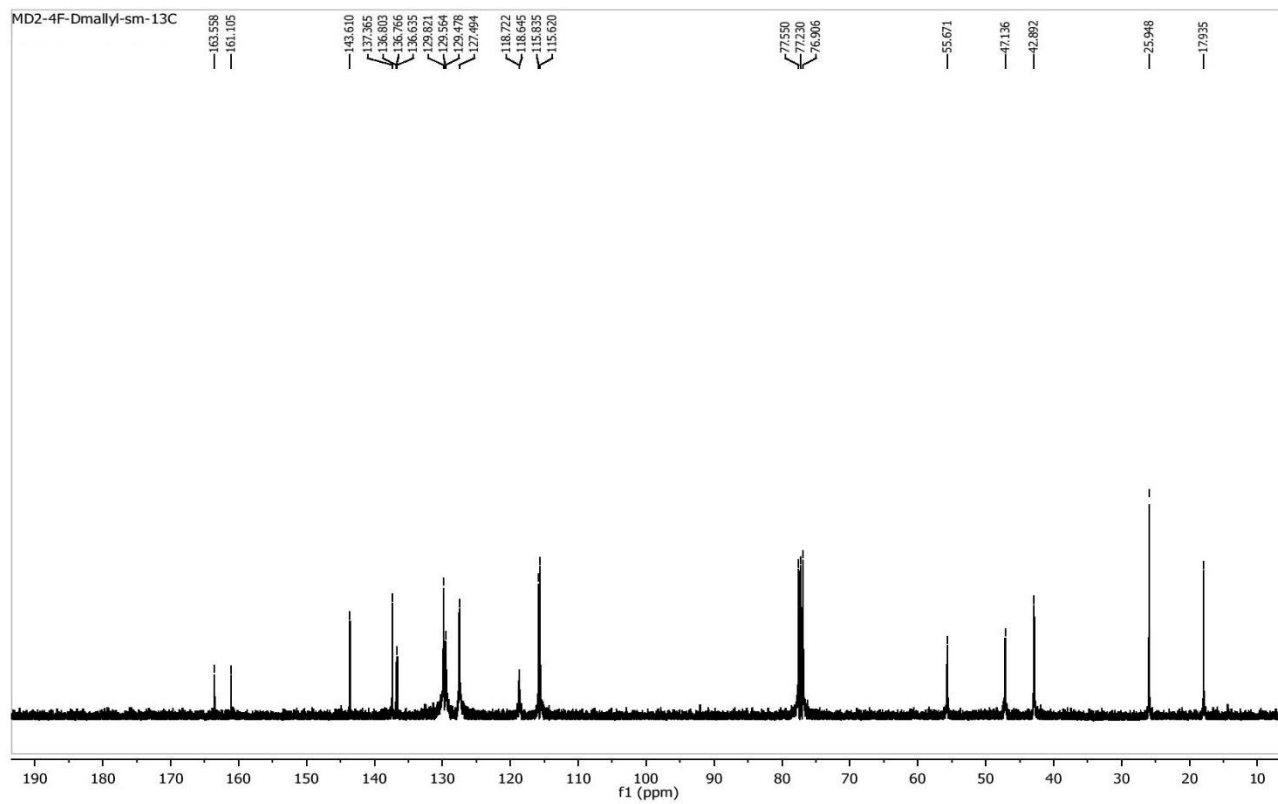

# $^1\text{H}$ and $^{13}\text{C}$ Spectra of compound **1h**

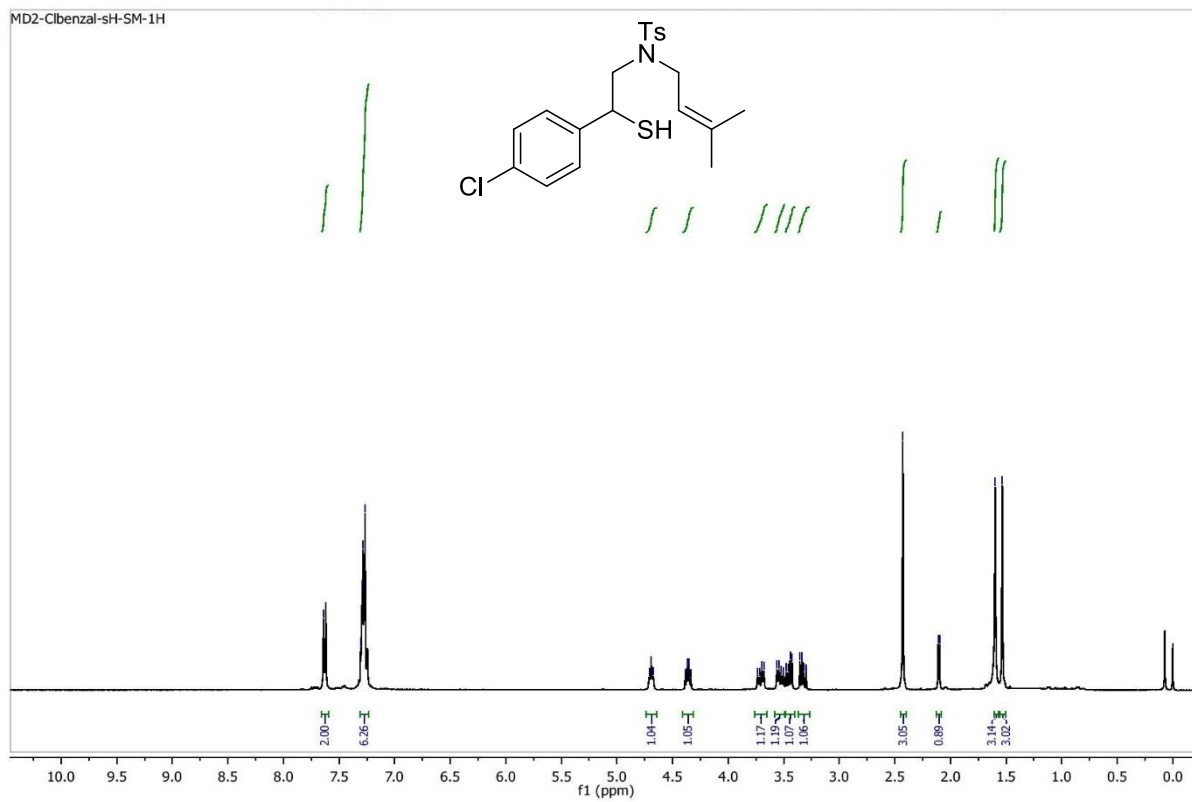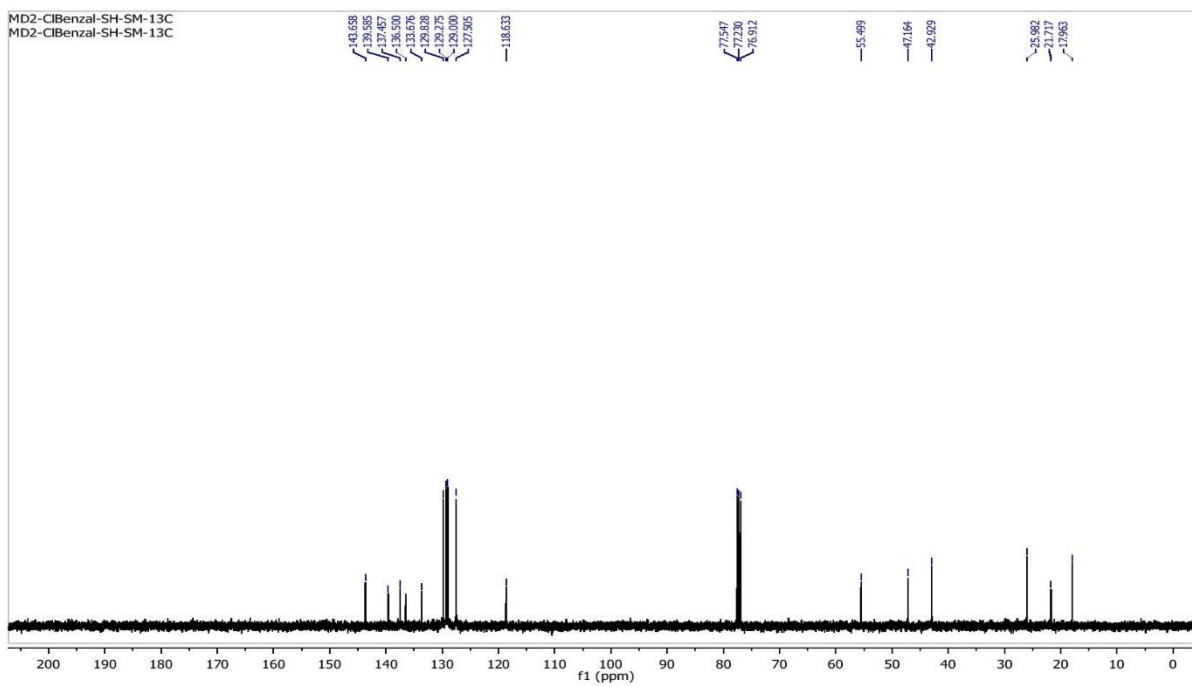

$^1\text{H}$  and  $^{13}\text{C}$  Spectra of compound **1j**

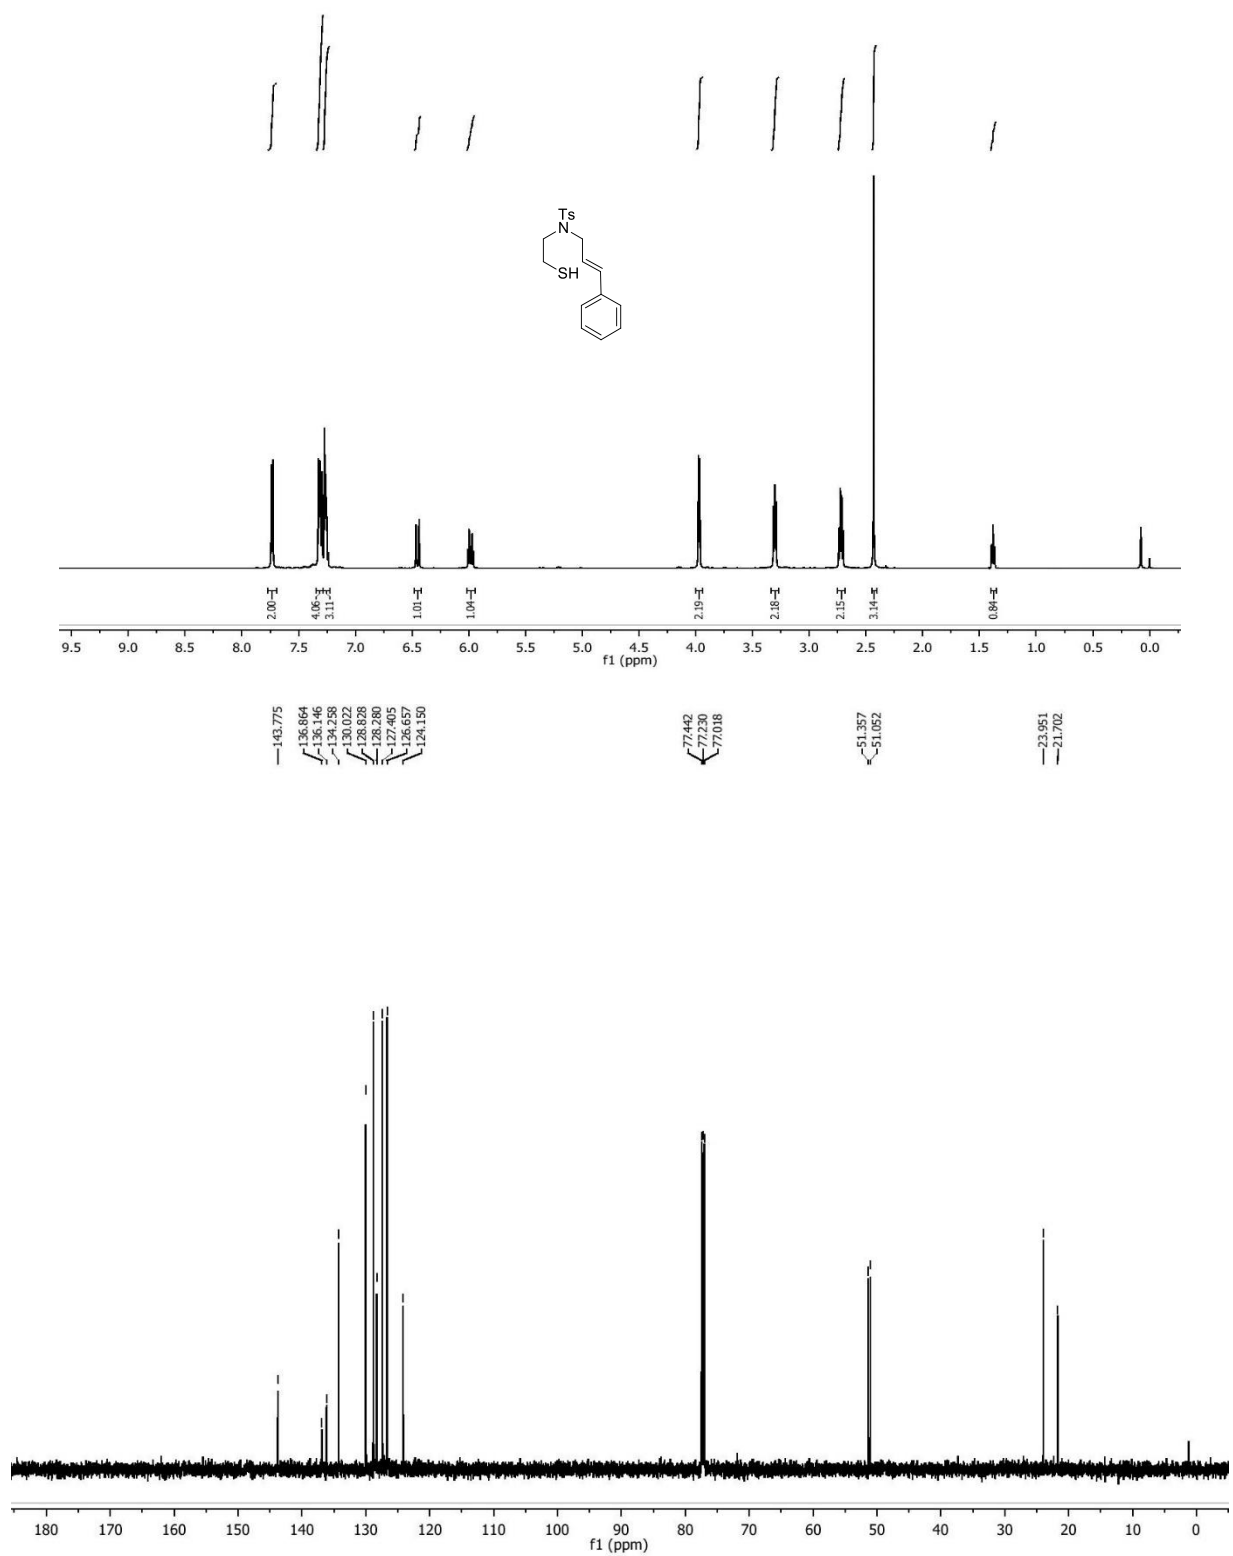

# $^1\text{H}$ and $^{13}\text{C}$ Spectra of compound **1k**

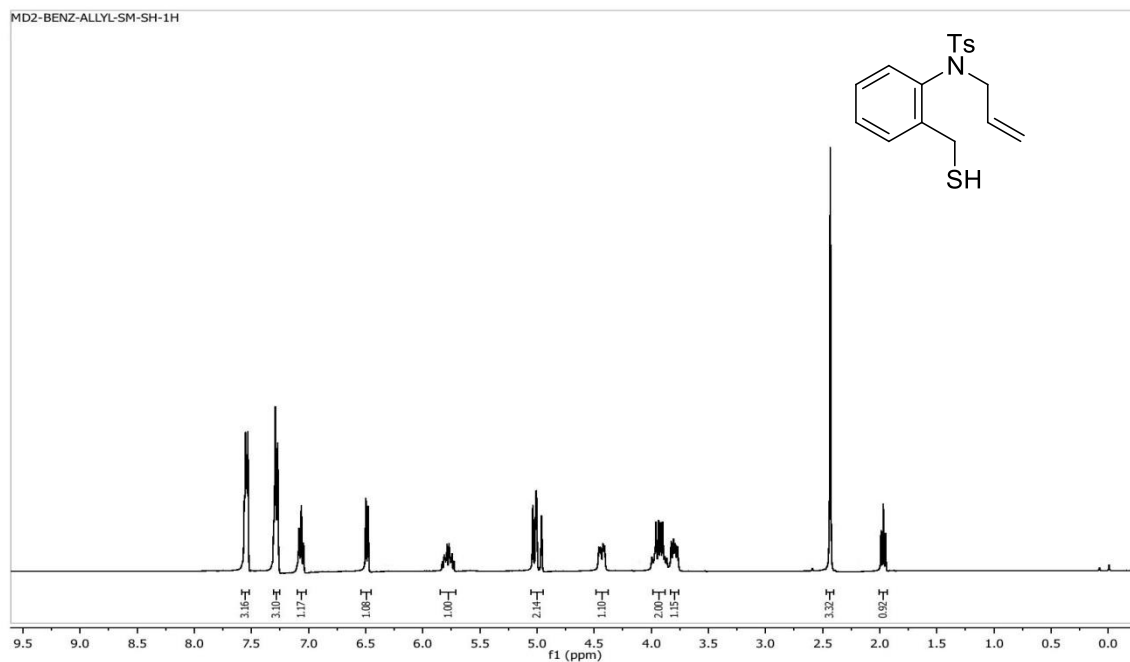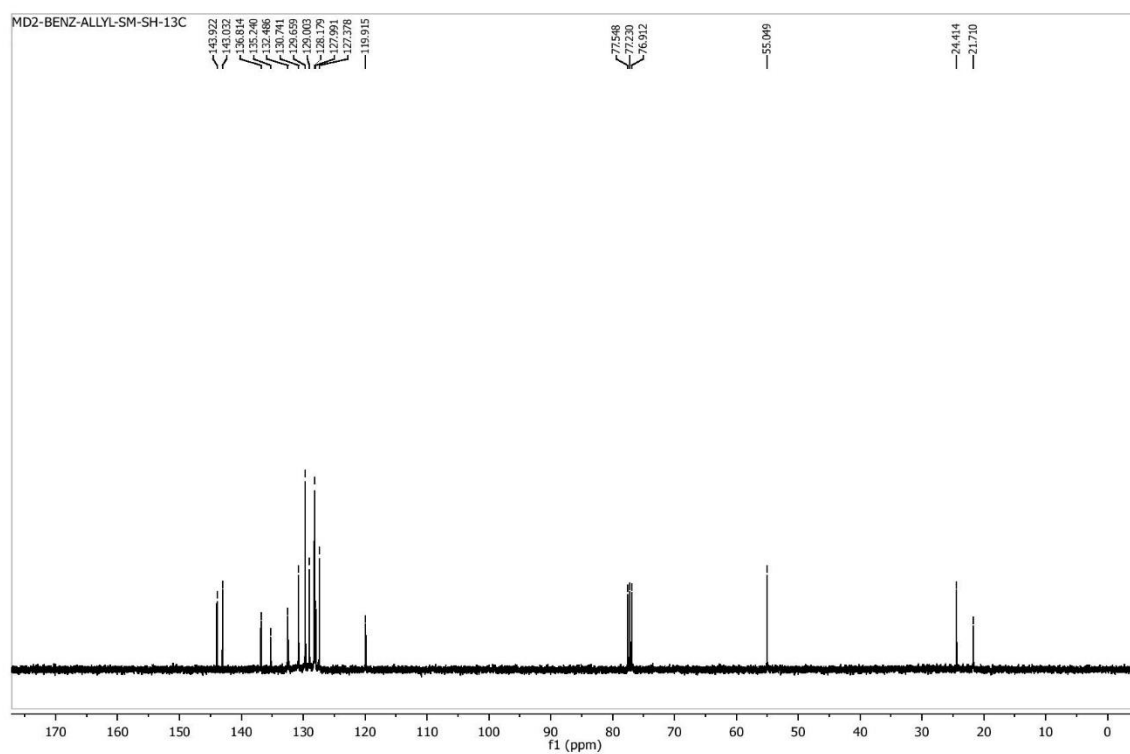



# $^1\text{H}$ and $^{13}\text{C}$ Spectra of compound **11**

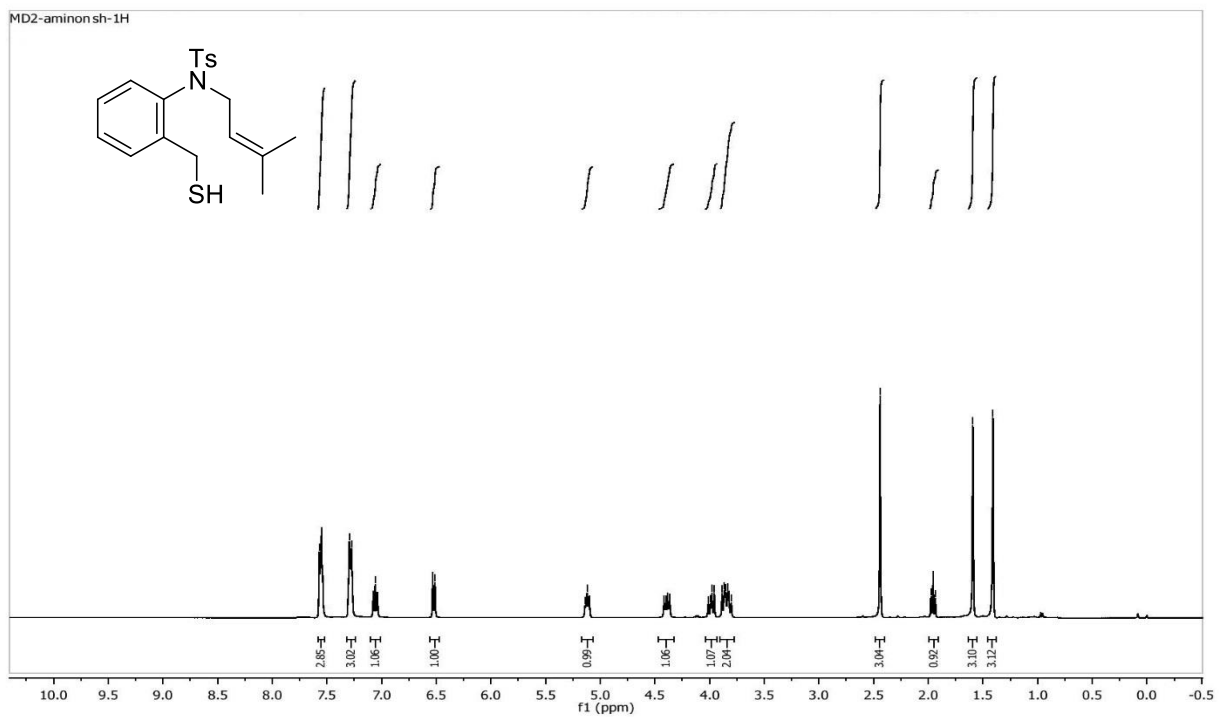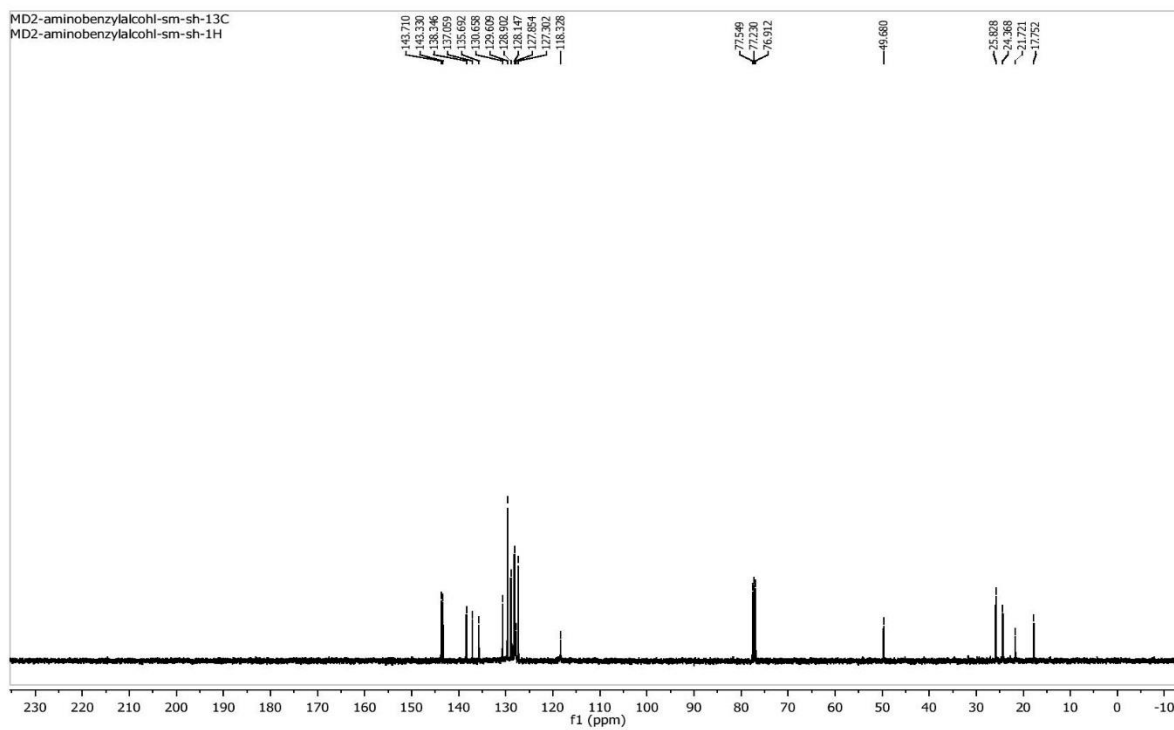

# $^1\text{H}$ and $^{13}\text{C}$ Spectra of compound 2a

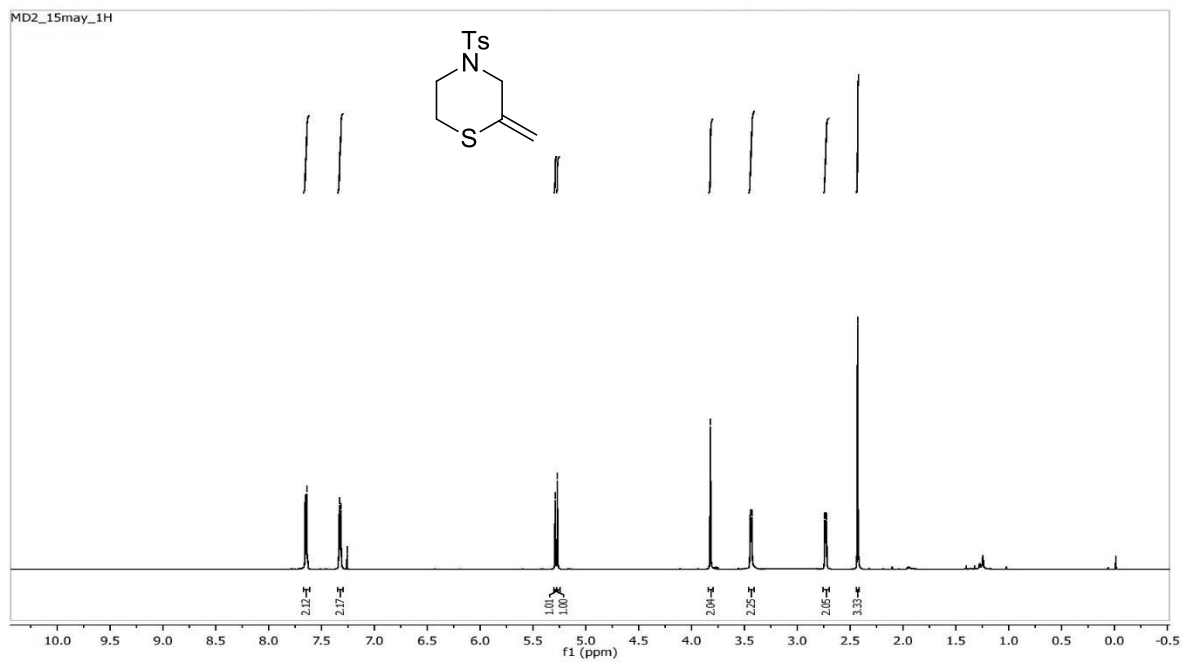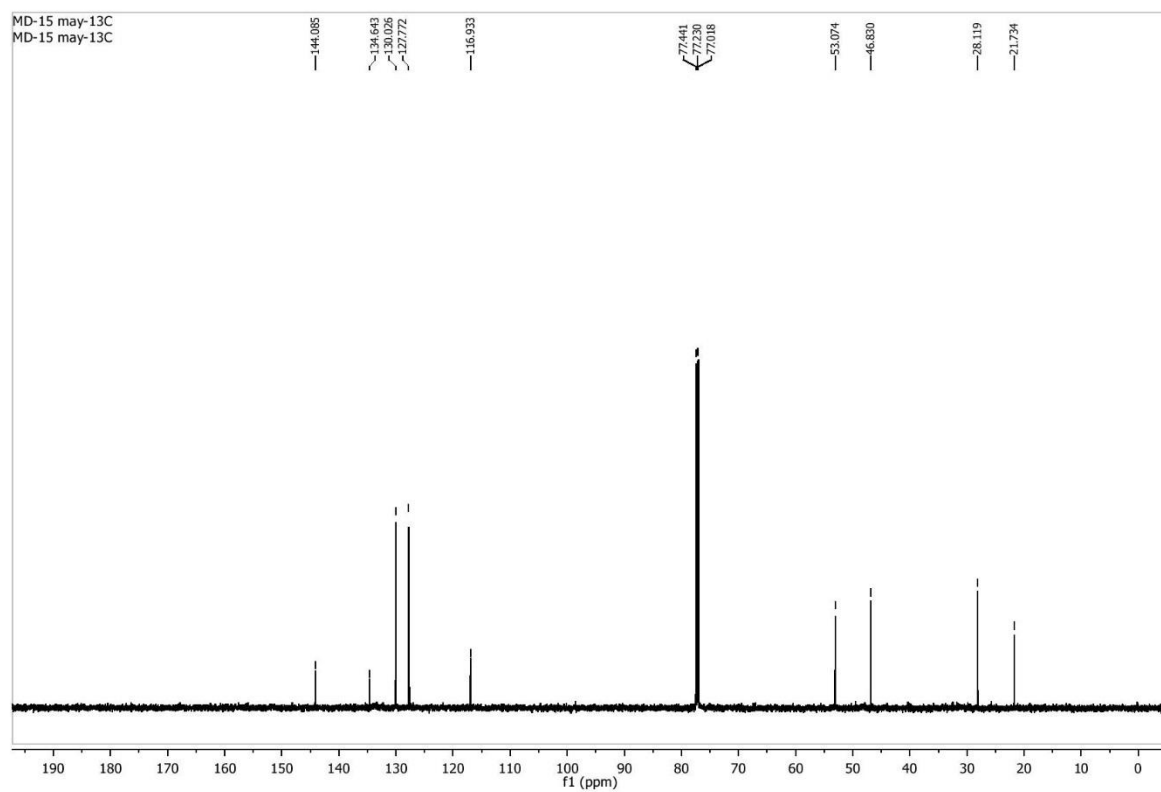

# $^1\text{H}$ and $^{13}\text{C}$ Spectra of compound **2b**

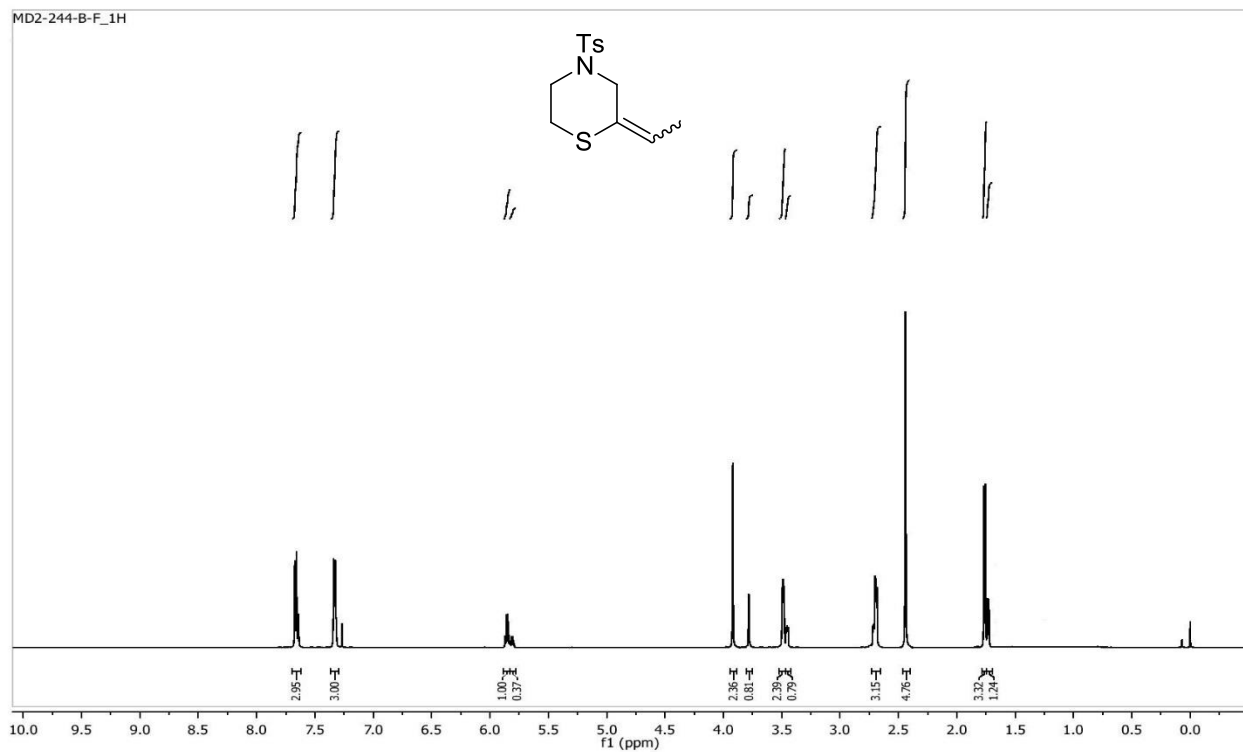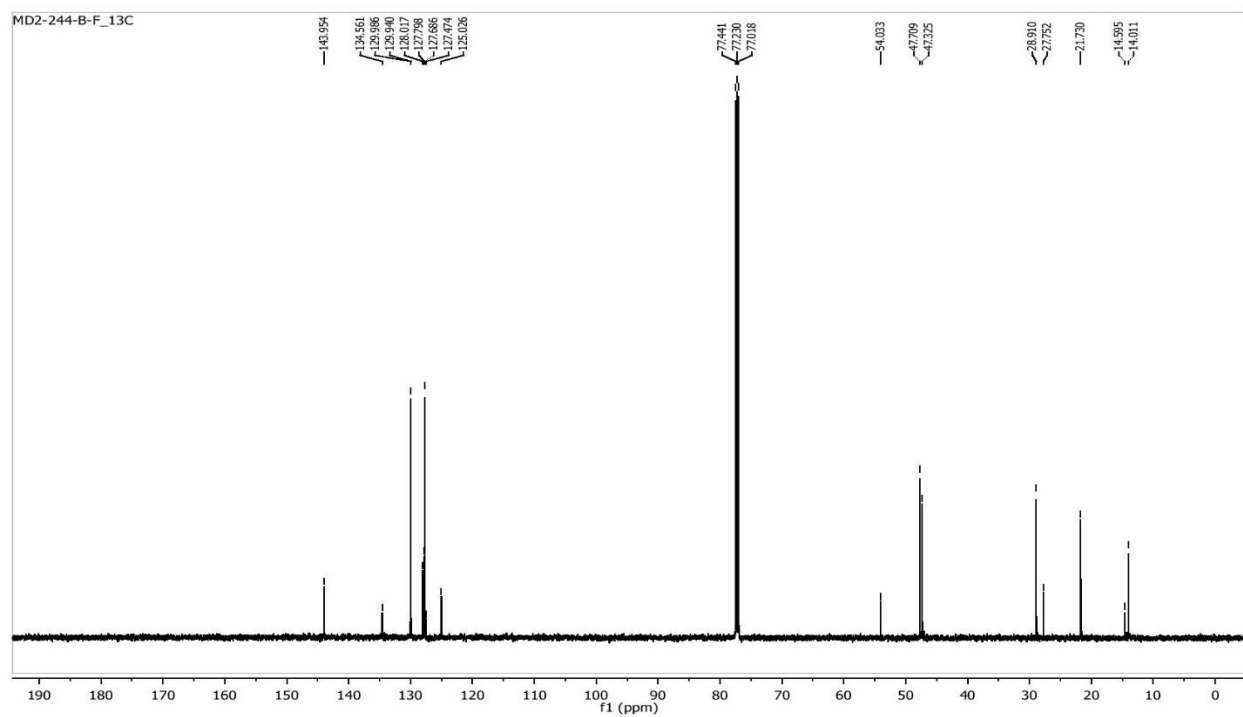

# <sup>1</sup>H and <sup>13</sup>C Spectra of compound 2c

MD2-33DMALLYL-F\_1H

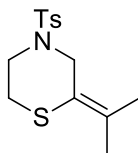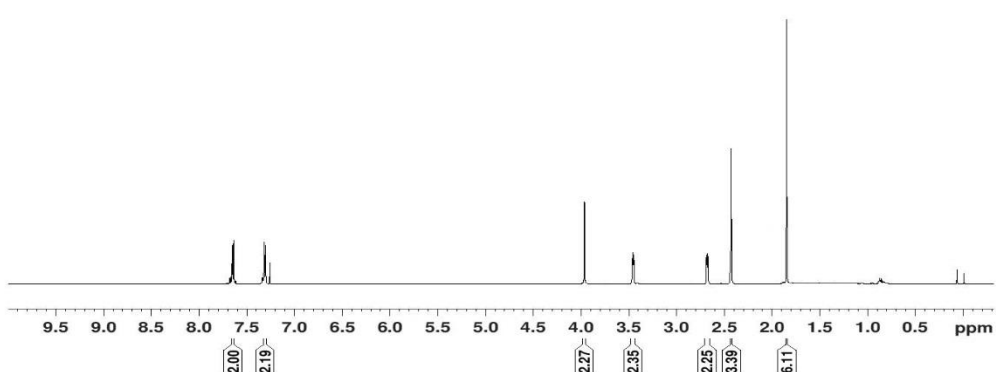

```
Current Data Parameters
NAME MD2-33DMALLYL-F_1H
EXPNO 1
PROCNO 1

F2 - Acquisition Parameters
Date_ 20150916
Time 9:05
INSTRUM spect
PROBHD 5 mm F4BBO BB/
PULPROG zgpg30
TD 32768
SOLVENT CDCl3
NS 15
DS 2
SWH 12019.230 Hz
FIDRES 0.346788 Hz
AQ 31.261168 sec
RG 48.18
DW 41.600 usec
DE 6.50 usec
TE 285.0 K
D1 1.0000000 sec
TD0 1

===== CHANNEL f1 =====
SFO1 600.137053 MHz
NUC1 1H
P1 12.00 usec
PLW1 21.0000000 W

F2 - Processing parameters
SI 16384
SF 600.1700149 MHz
WDW EM
SSB 0
GB 0
PC 1.00
```

MD2-33DMALLYL-F\_13C

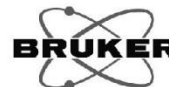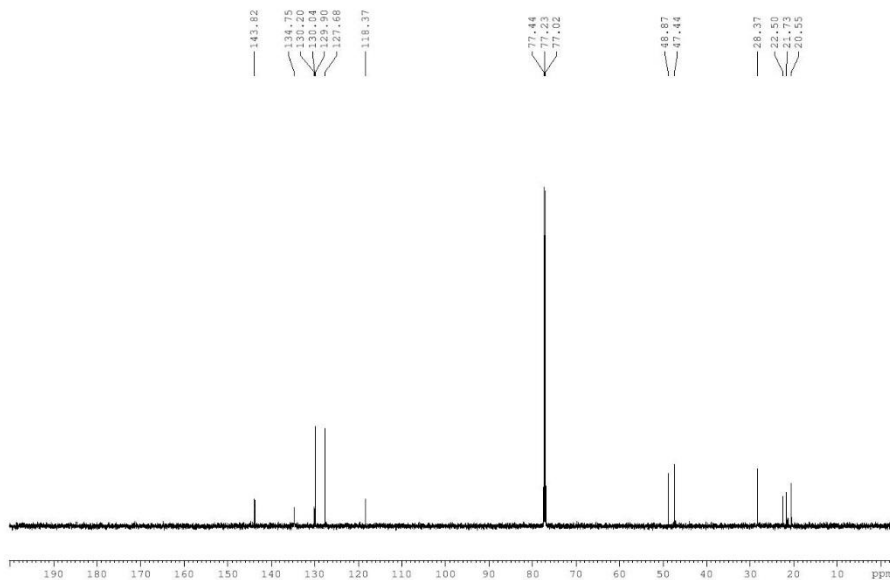

```
Current Data Parameters
NAME MD2-33DMALLYL-F_13C
EXPNO 1
PROCNO 1

F2 - Acquisition Parameters
Date_ 20150916
Time 9:12
INSTRUM spect
PROBHD 5 mm F4BBO BB/
PULPROG zgpg30
TD 32768
SOLVENT CDCl3
NS 197
DS 2
SWH 36057.691 Hz
FIDRES 1.100393 Hz
AQ 0.4043829 sec
RG 65.24
DW 13.867 usec
DE 6.50 usec
TE 296.4 K
D1 2.0000000 sec
D11 0.0300000 sec
TD0 1

===== CHANNEL f1 =====
SFO1 150.9279571 MHz
NUC1 13C
P1 10.50 usec
PLW1 95.0000000 W

===== CHANNEL f2 =====
SFO2 600.1324007 MHz
NUC2 1H
CPPRG12 waltz16
PCPD2 70.00 usec
PLW2 21.0000000 W
PLW12 0.41714000 W
PLW13 0.30239999 W

F2 - Processing parameters
SI 16384
SF 150.9128381 MHz
WDW EM
SSB 0
GB 0
PC 1.40
```

# $^1\text{H}$ and $^{13}\text{C}$ Spectra of compound **2d**

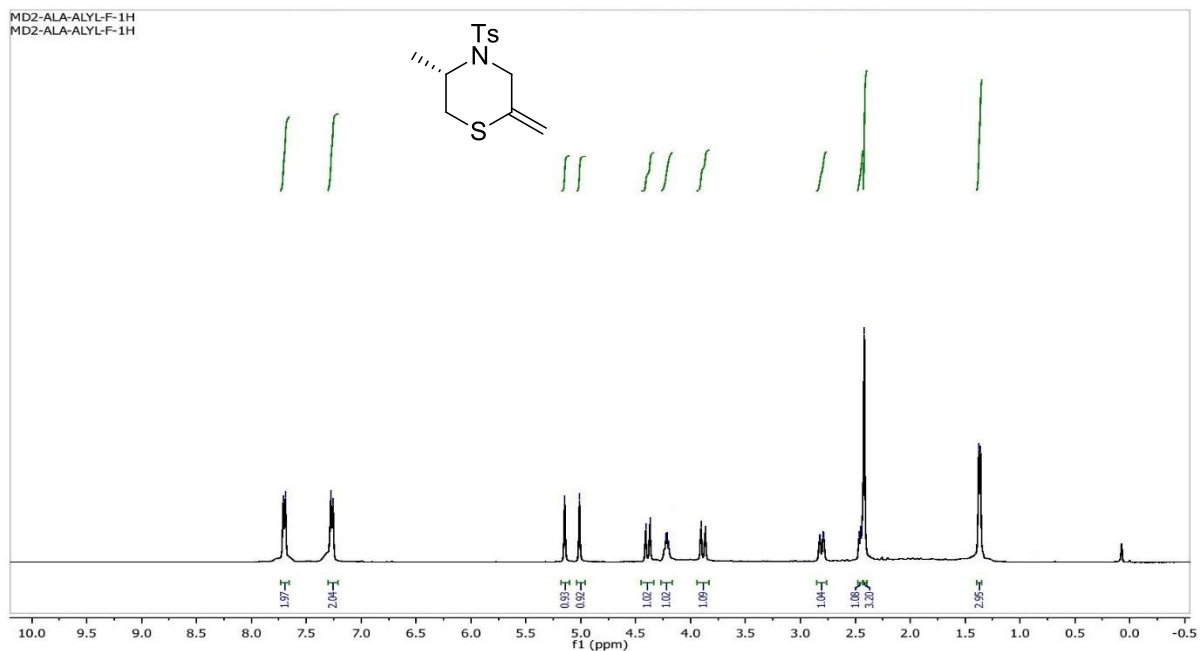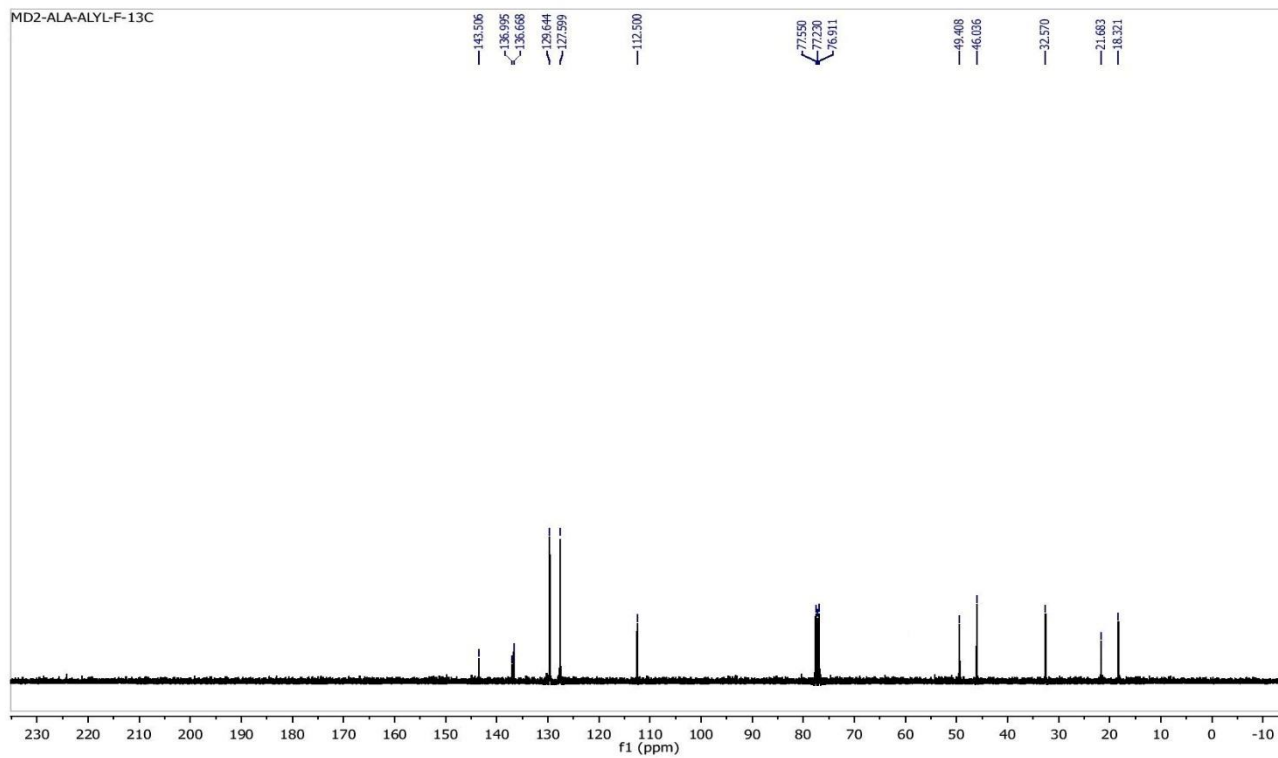

# $^1\text{H}$ and $^{13}\text{C}$ Spectra of compound **2e**

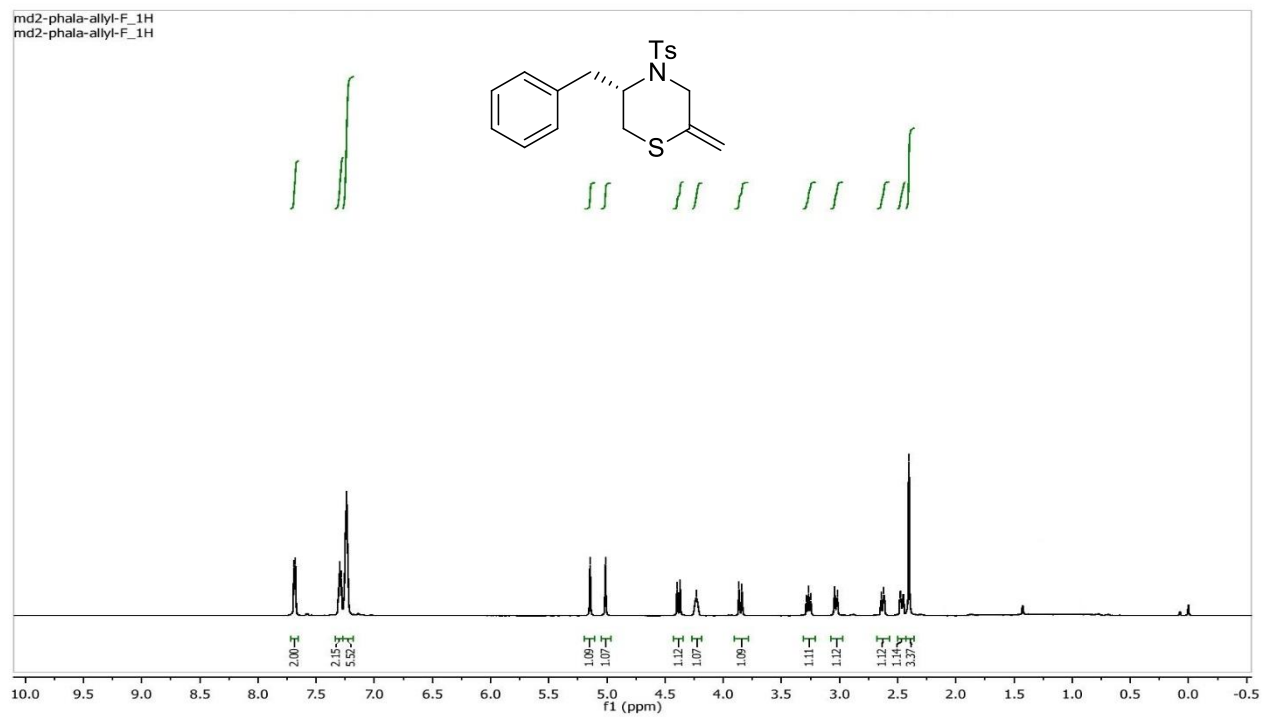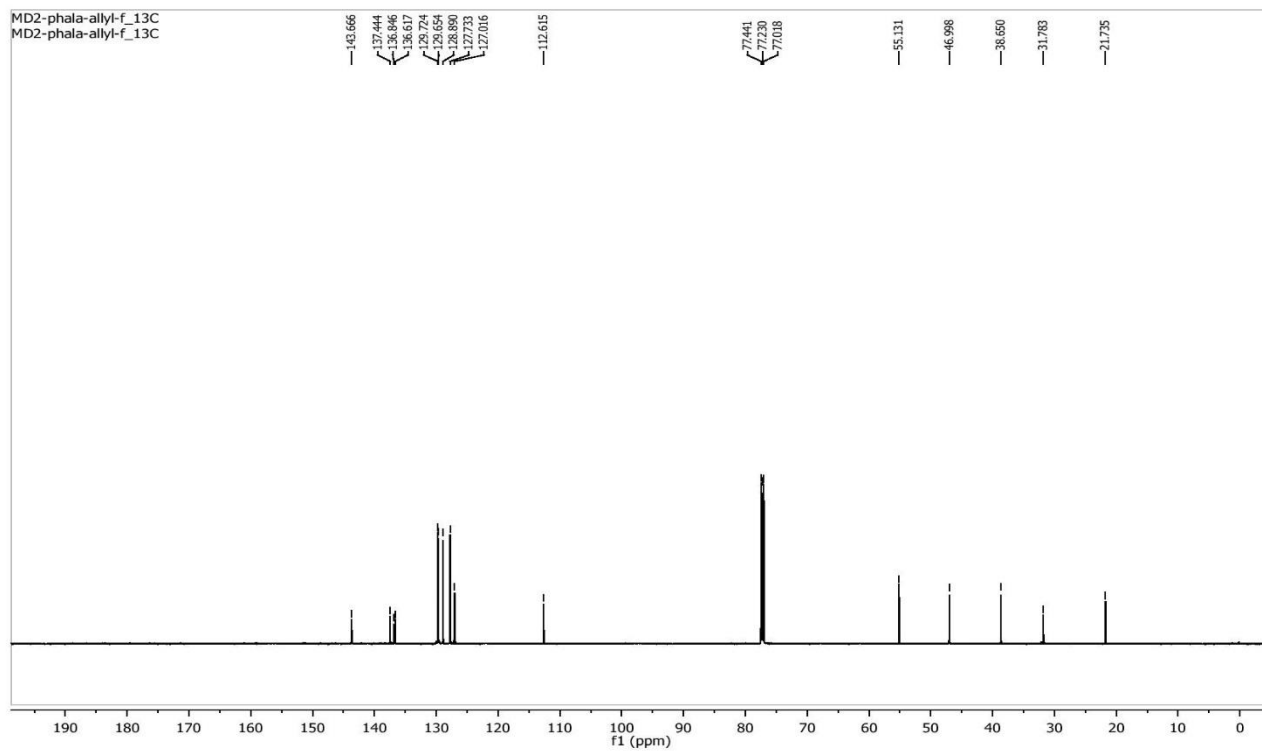

# $^1\text{H}$ and $^{13}\text{C}$ Spectra of compound **2f**

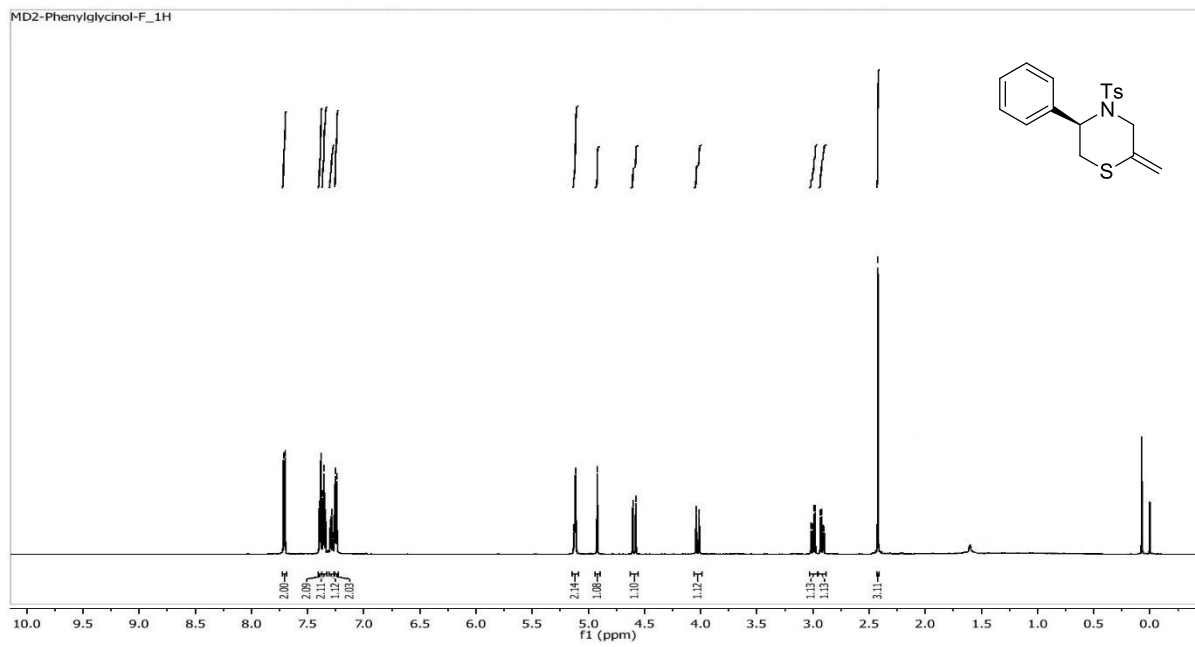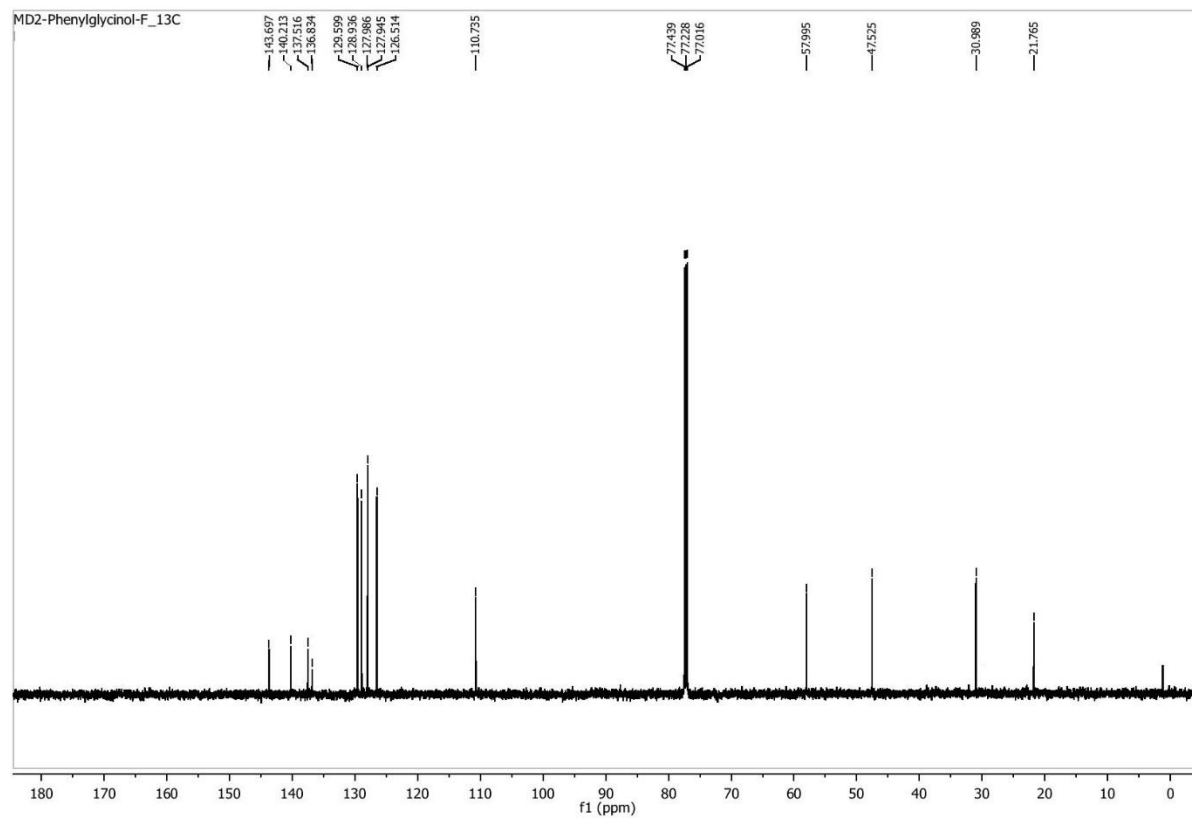

# $^1\text{H}$ and $^{13}\text{C}$ Spectra of compound **2g**

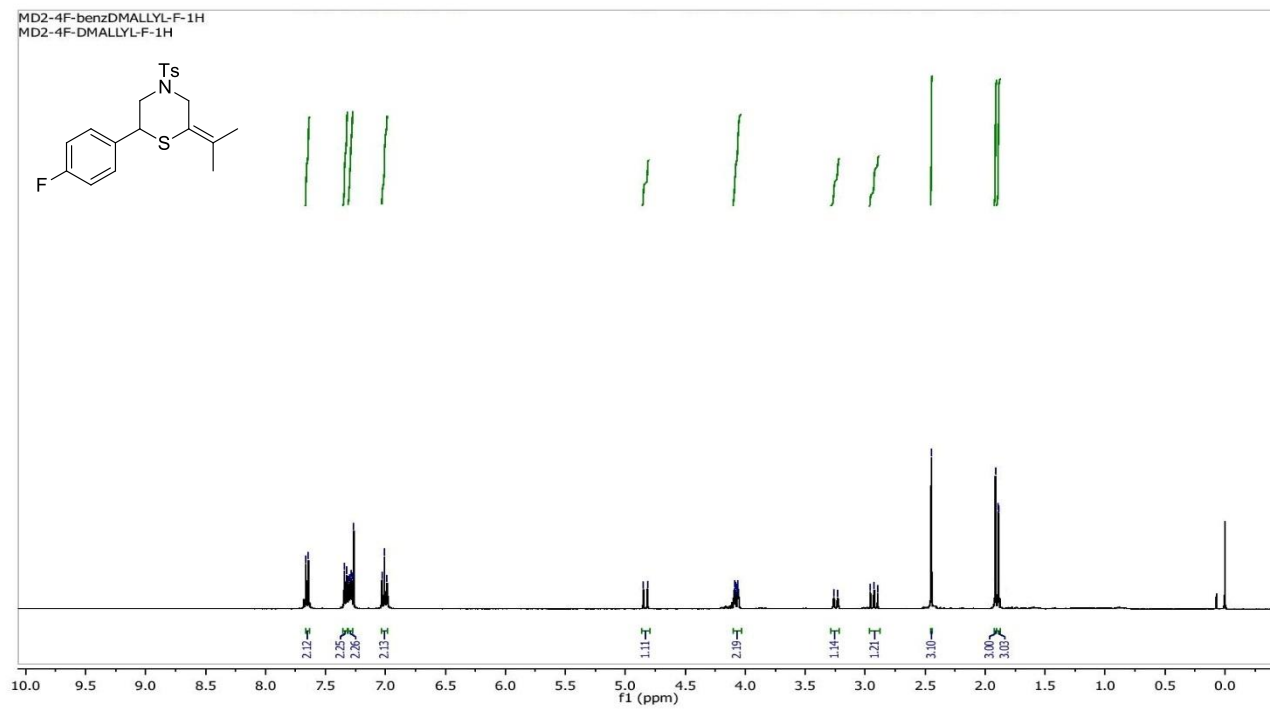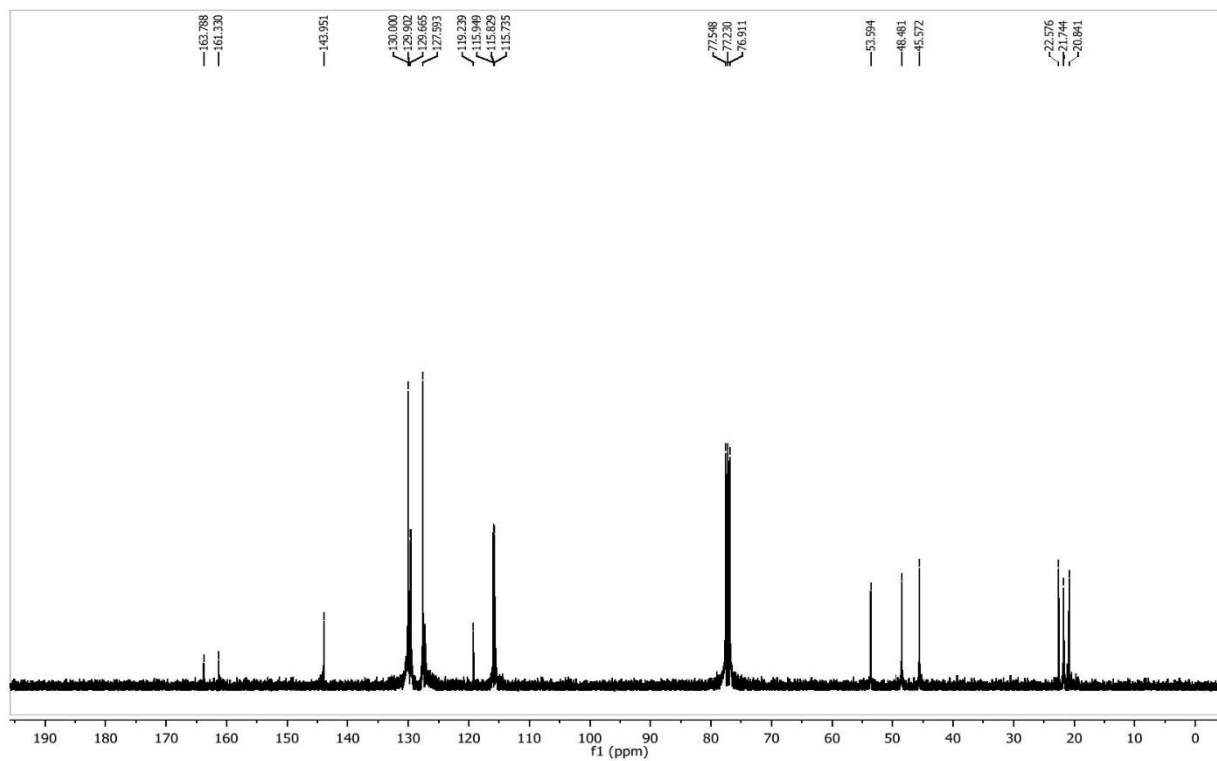



# $^1\text{H}$ and $^{13}\text{C}$ Spectra of compound **2h**

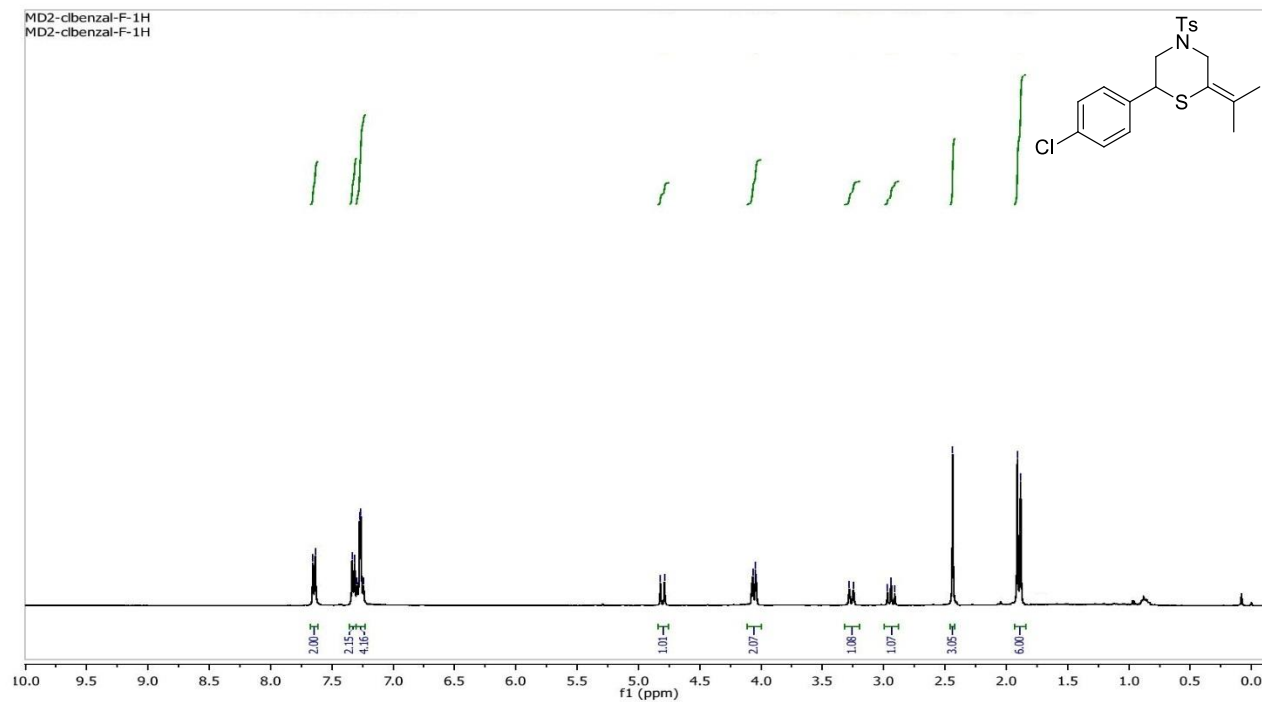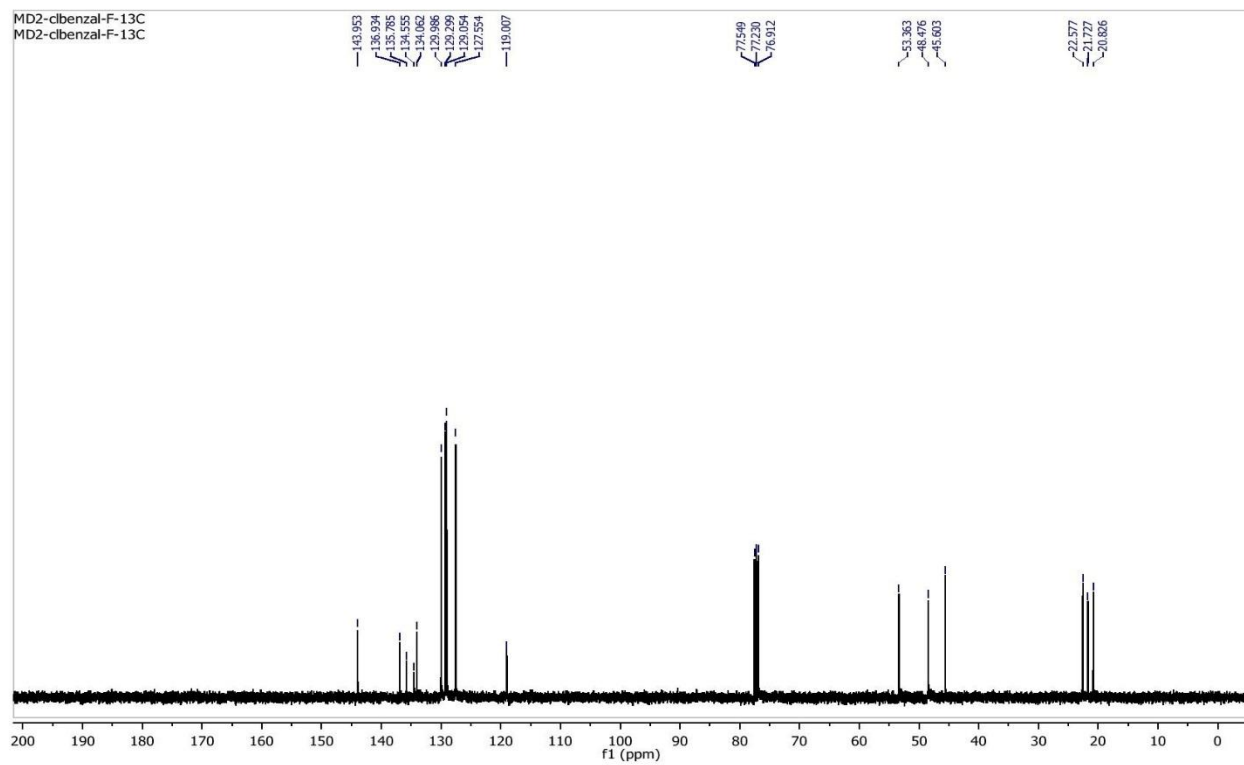

# $^1\text{H}$ and $^{13}\text{C}$ Spectra of compound **2i**

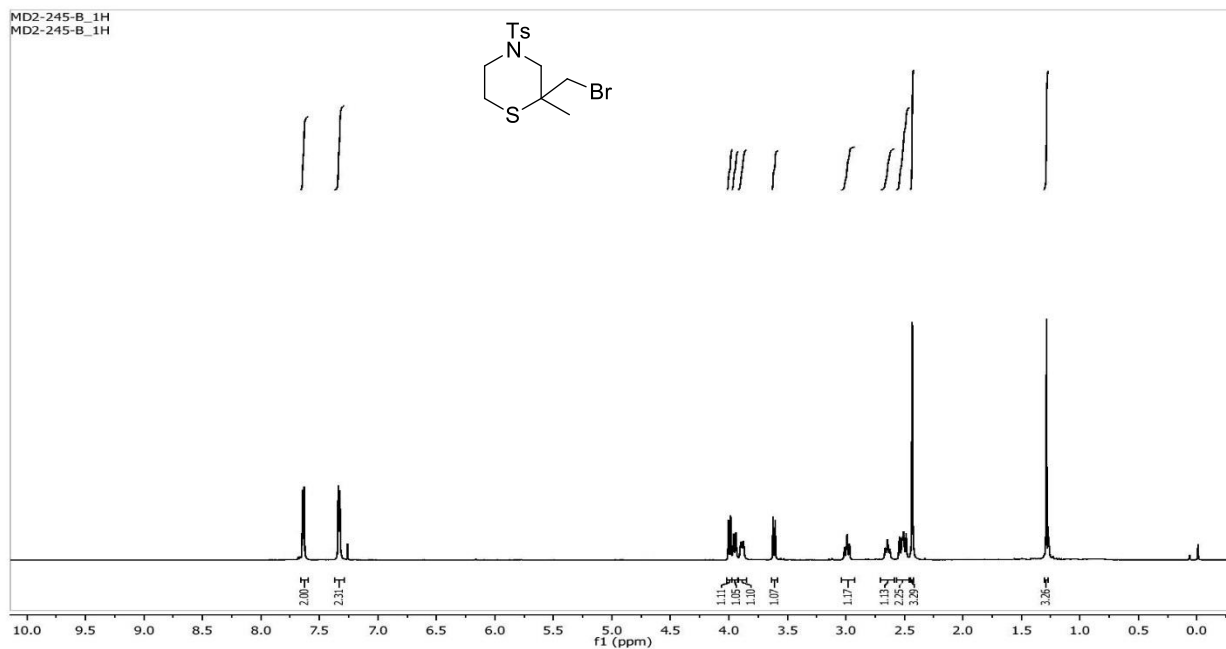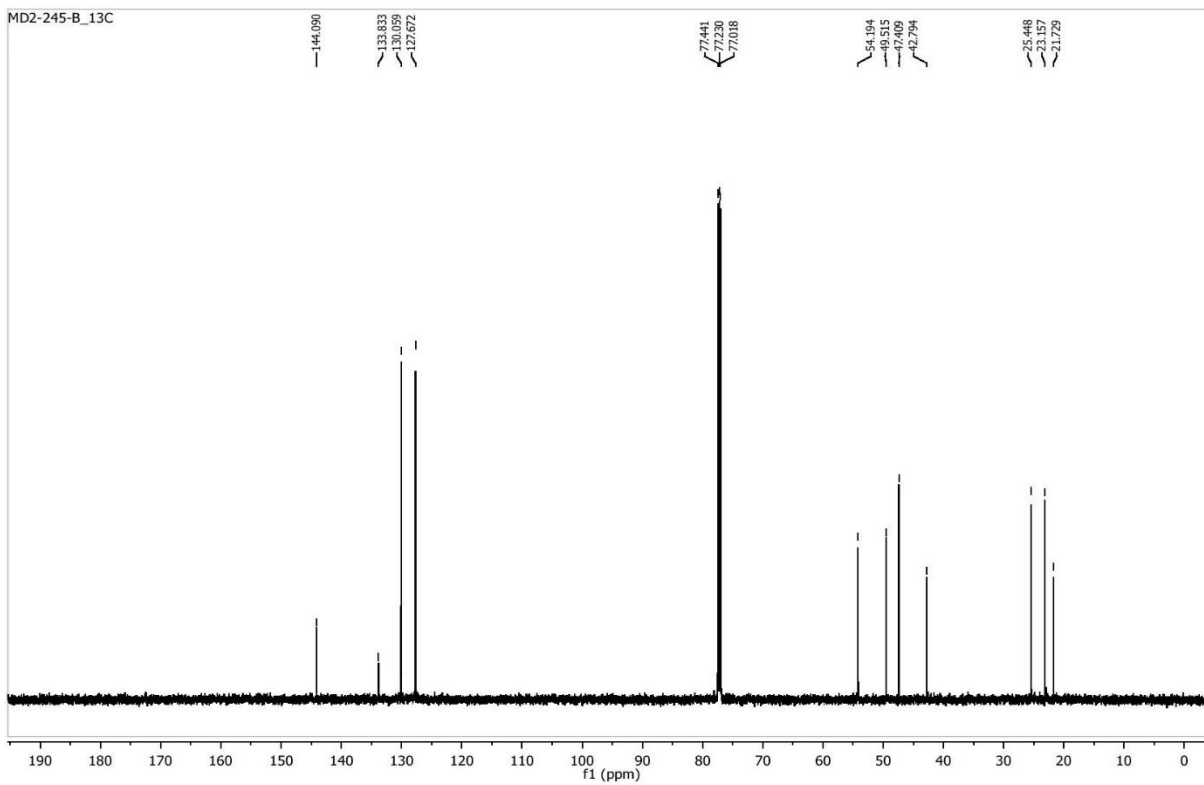

# $^1\text{H}$ and $^{13}\text{C}$ Spectra of compound **2j**

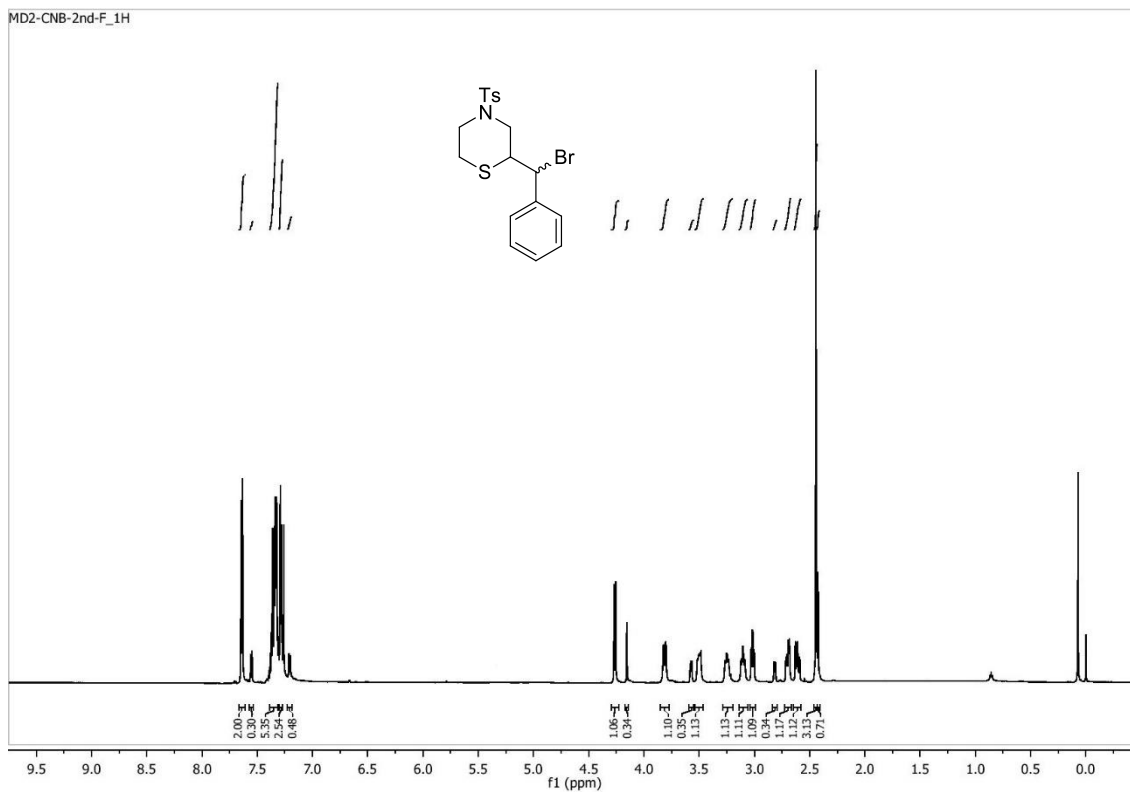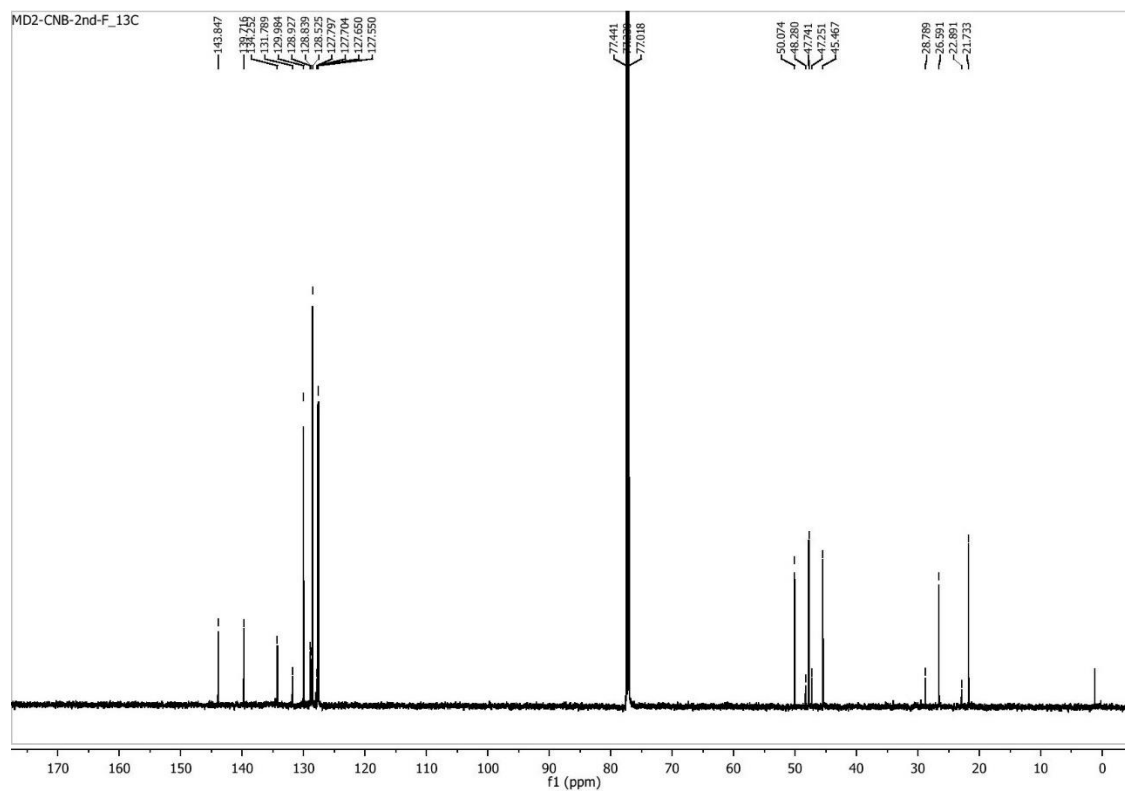

# $^1\text{H}$ and $^{13}\text{C}$ Spectra of compound **2k**

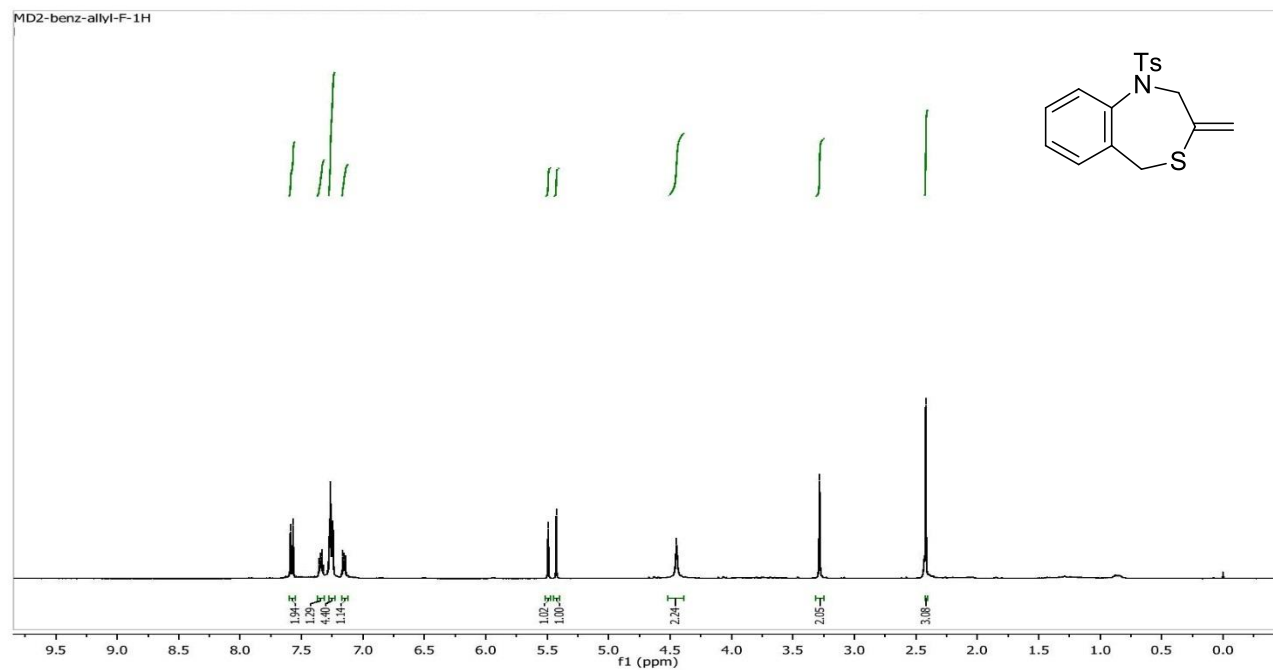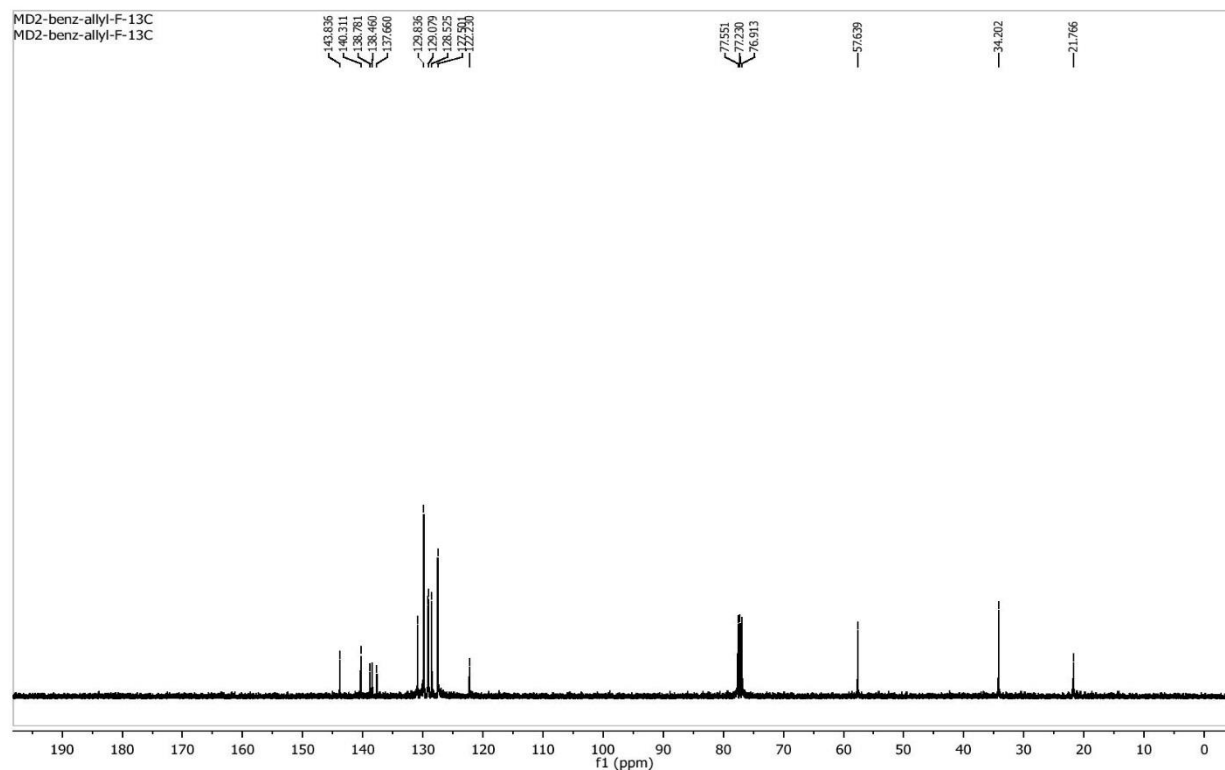

# $^1\text{H}$ and $^{13}\text{C}$ Spectra of compound **21**

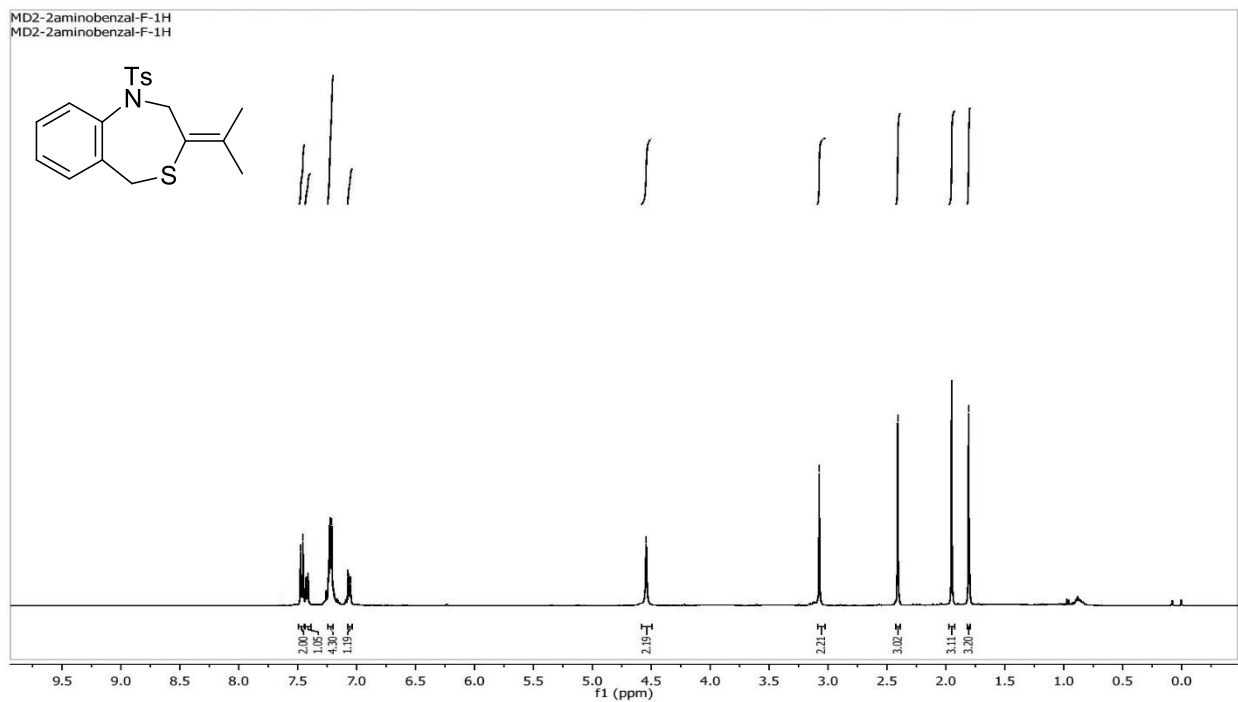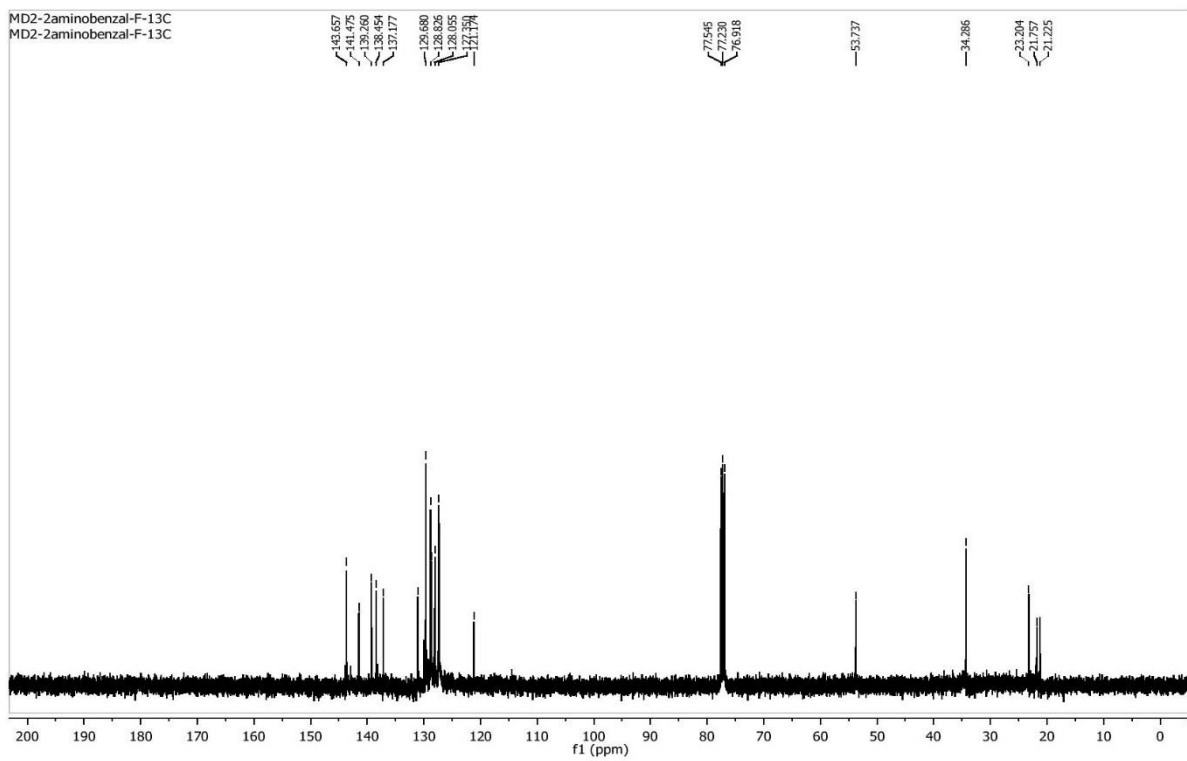

# $^1\text{H}$ and $^{13}\text{C}$ Spectra of compound **2m**

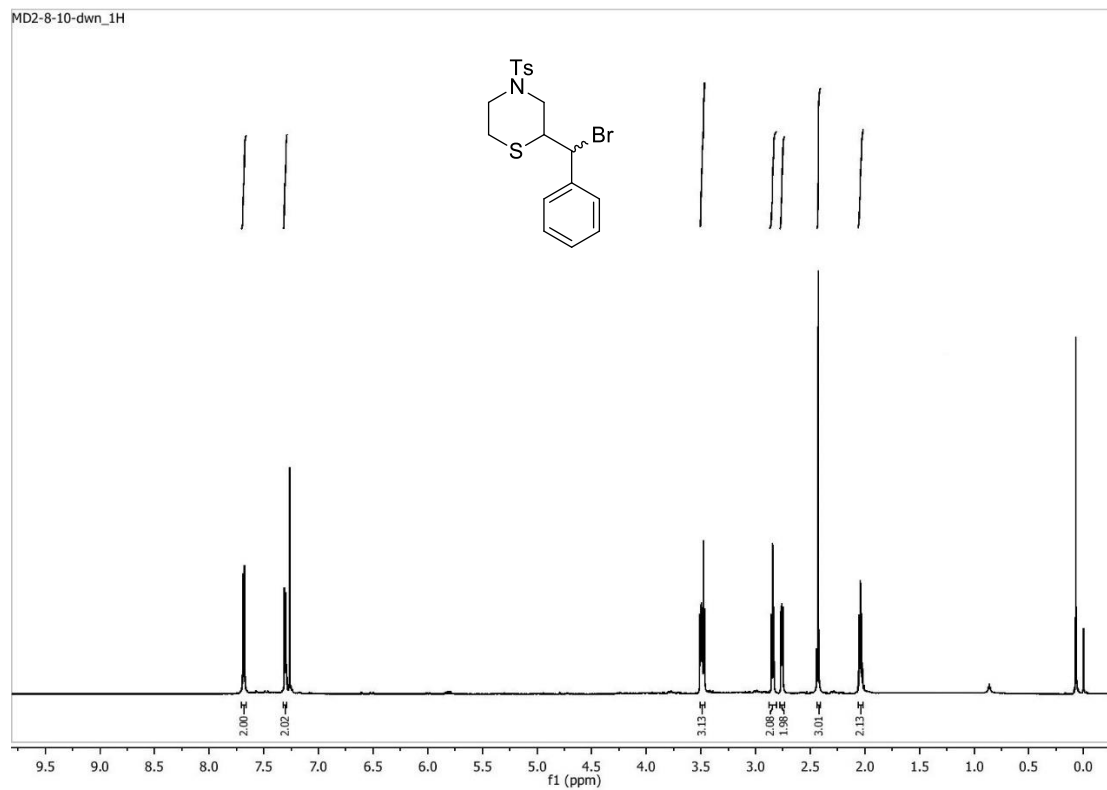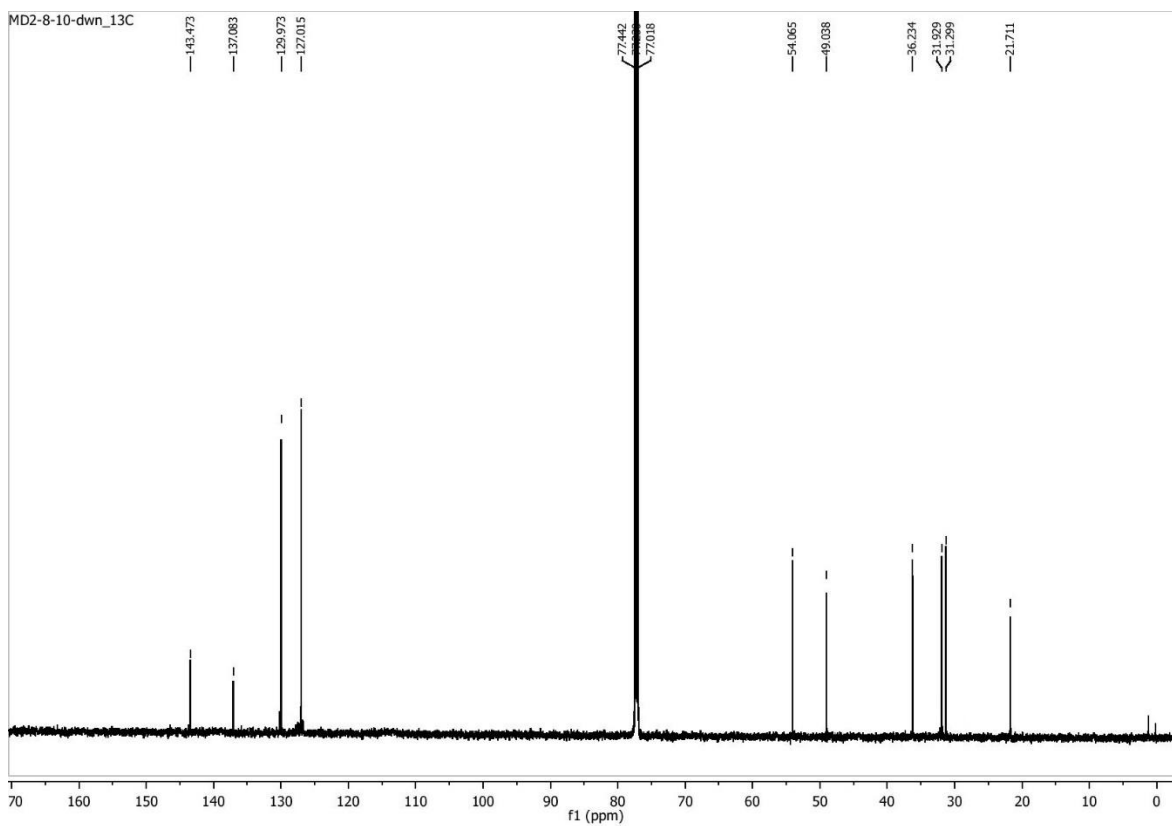

Supplement: c6ob01869f1.pdf [file c6ob01869f1.pdf]
