# Supplementary material for: Highly regioselective synthesis of 4-tosylthiomorpholine via intramolecular cyclization of N-tethered thioalkenols
Source: Royal Society of Chemistry journal article supplement (doi:10.1039/c6ob01869f), 2016-01-01

## Supporting Information

### Highly Regioselective Synthesis of 4-Tosylthiomorpholine via Intramolecular Cyclization of *N*-Tethered Thioalkenols

*Manash J. Deka, Upasana Borthakur and Anil K. Saikia\**

#### Contents:

|                                  |        |
|----------------------------------|--------|
| 1. HRMS spectra of all compounds | S2-S10 |
|----------------------------------|--------|

## HRMS Spectrum of **1b**

|               |                |             |             |                 |                                   |                        |                  |
|---------------|----------------|-------------|-------------|-----------------|-----------------------------------|------------------------|------------------|
| Sample Name   | Unavailable    | Position    | Unavailable | Instrument Name | Unavailable                       | User Name              | Unavailable      |
| Inj Vol       | Unavailable    | InjPosition | Unavailable | SampleType      | Unavailable                       | IRM Calibration Status | Some Ions Missed |
| Data Filename | MD2-CROTYL-B.d | ACQ Method  |             | Comment         | Sample information is unavailable | Acquired Time          | Unavailable      |

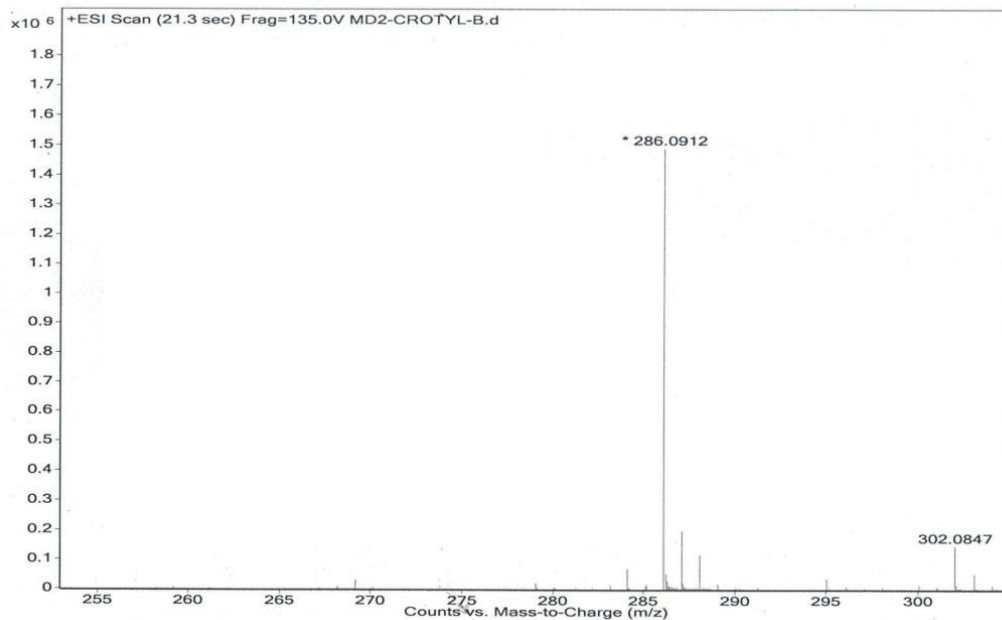

## HRMS Spectrum of **1d**

|               |                |             |        |                 |              |                        |                       |
|---------------|----------------|-------------|--------|-----------------|--------------|------------------------|-----------------------|
| Sample Name   | MD2-ALA-SM-B   | Position    | Vial 1 | Instrument Name | Instrument 1 | User Name              |                       |
| Inj Vol       | 0              | InjPosition |        | SampleType      | Sample       | IRM Calibration Status | Some Ions Missed      |
| Data Filename | MD2-ALA-SM-B.d | ACQ Method  |        | Comment         |              | Acquired Time          | 7/21/2016 11:41:58 AM |

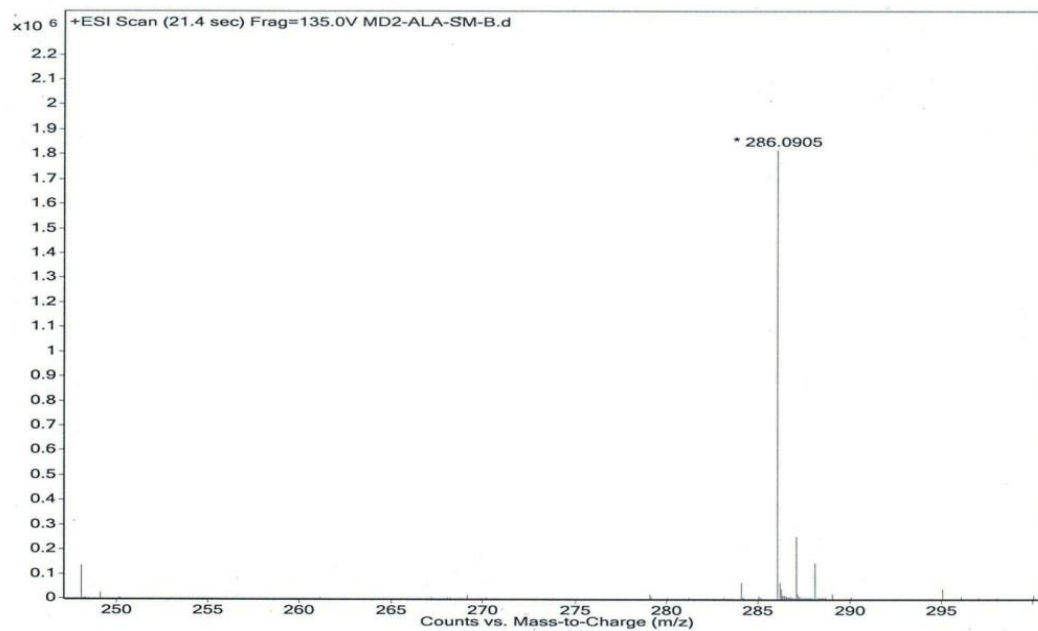

## HRMS Spectrum of **1f**

|               |                    |             |        |                 |              |                        |                       |
|---------------|--------------------|-------------|--------|-----------------|--------------|------------------------|-----------------------|
| Sample Name   | MD2-PHEGLY-SM-SH   | Position    | Vial 1 | Instrument Name | Instrument 1 | User Name              |                       |
| Inj Vol       | 0                  | InjPosition |        | SampleType      | Sample       | IRM Calibration Status | Some Ions Missed      |
| Data Filename | MD2-PHEGLY-SM-SH.d | ACQ Method  |        | Comment         |              | Acquired Time          | 2/16/2016 10:44:29 AM |

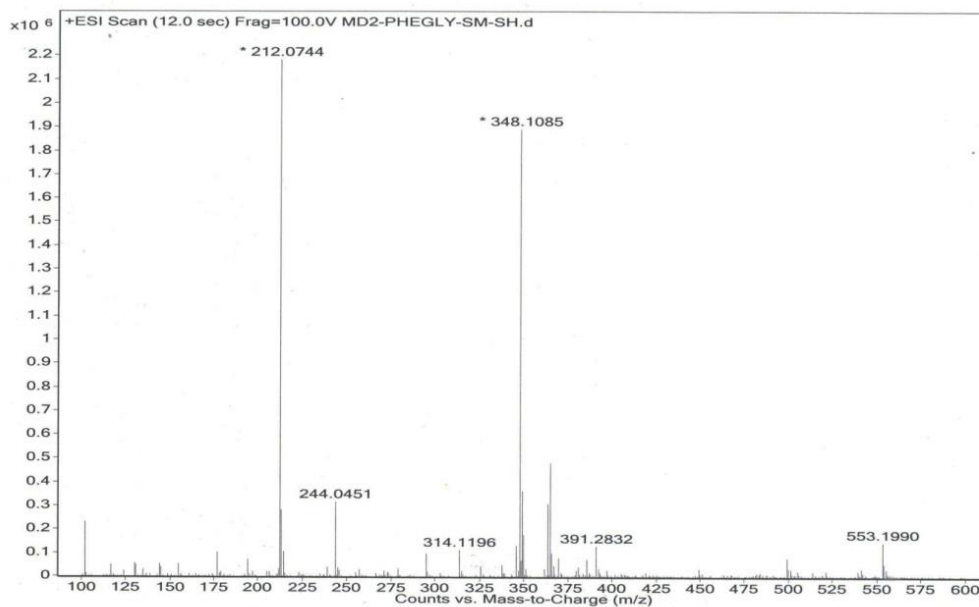

## HRMS Spectrum of **1g**

|               |                 |             |        |                 |              |                        |                        |
|---------------|-----------------|-------------|--------|-----------------|--------------|------------------------|------------------------|
| Sample Name   | MD2-4FD-SH-SM   | Position    | Vial 1 | Instrument Name | Instrument 1 | User Name              |                        |
| Inj Vol       | 0               | InjPosition |        | SampleType      | Sample       | IRM Calibration Status | Some Ions Missed       |
| Data Filename | MD2-4FD-SH-SM.d | ACQ Method  |        | Comment         |              | Acquired Time          | 12/21/2015 11:33:52 AM |

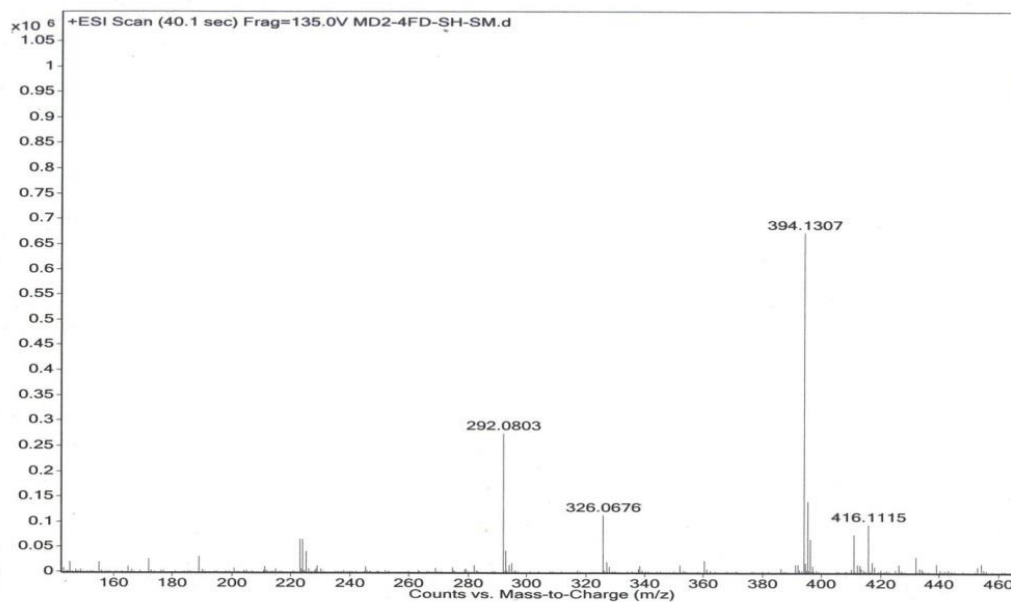

## HRMS Spectrum of 1h

|               |                |             |             |                 |                                   |                        |                  |
|---------------|----------------|-------------|-------------|-----------------|-----------------------------------|------------------------|------------------|
| Sample Name   | Unavailable    | Position    | Unavailable | Instrument Name | Unavailable                       | User Name              | Unavailable      |
| Inj Vol       | Unavailable    | InjPosition | Unavailable | SampleType      | Unavailable                       | IRM Calibration Status | Some Ions Missed |
| Data Filename | MD2-4CL-SM-B.d | ACQ Method  |             | Comment         | Sample information is unavailable | Acquired Time          | Unavailable      |

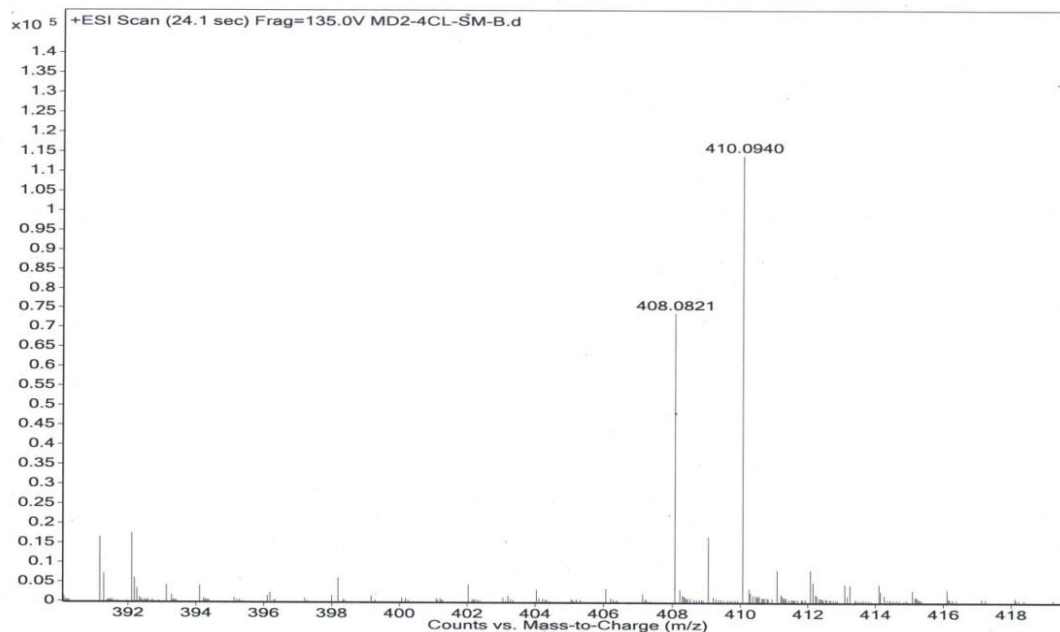

## HRMS Spectrum of 1j

|               |                   |             |             |                 |                                   |                        |                  |
|---------------|-------------------|-------------|-------------|-----------------|-----------------------------------|------------------------|------------------|
| Sample Name   | Unavailable       | Position    | Unavailable | Instrument Name | Unavailable                       | User Name              | Unavailable      |
| Inj Vol       | Unavailable       | InjPosition | Unavailable | SampleType      | Unavailable                       | IRM Calibration Status | Some Ions Missed |
| Data Filename | MD2-BENZALYL-SM.d | ACQ Method  |             | Comment         | Sample information is unavailable | Acquired Time          | Unavailable      |

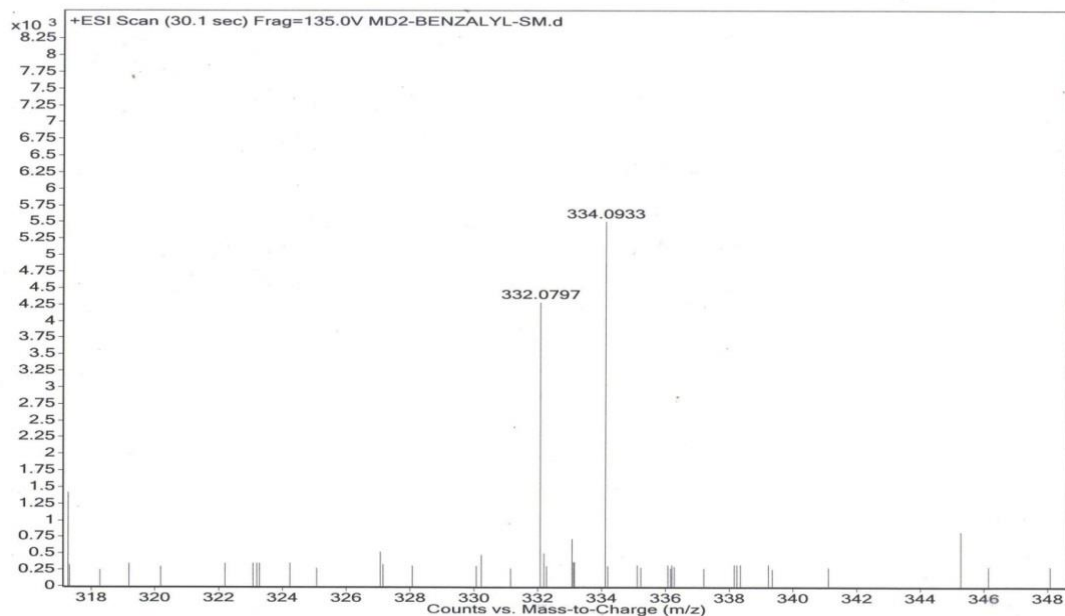

## HRMS Spectrum of 1k

|               |                      |             |             |                 |                                   |                        |                 |
|---------------|----------------------|-------------|-------------|-----------------|-----------------------------------|------------------------|-----------------|
| Sample Name   | Unavailable          | Position    | Unavailable | Instrument Name | Unavailable                       | User Name              | Unavailable     |
| Inj Vol       | Unavailable          | InjPosition | Unavailable | SampleType      | Unavailable                       | IRM Calibration Status | All Ions Missed |
| Data Filename | MD2-BENZ-DMALYL-SM-B | ACQ Method  |             | Comment         | Sample information is unavailable | Acquired Time          | Unavailable     |

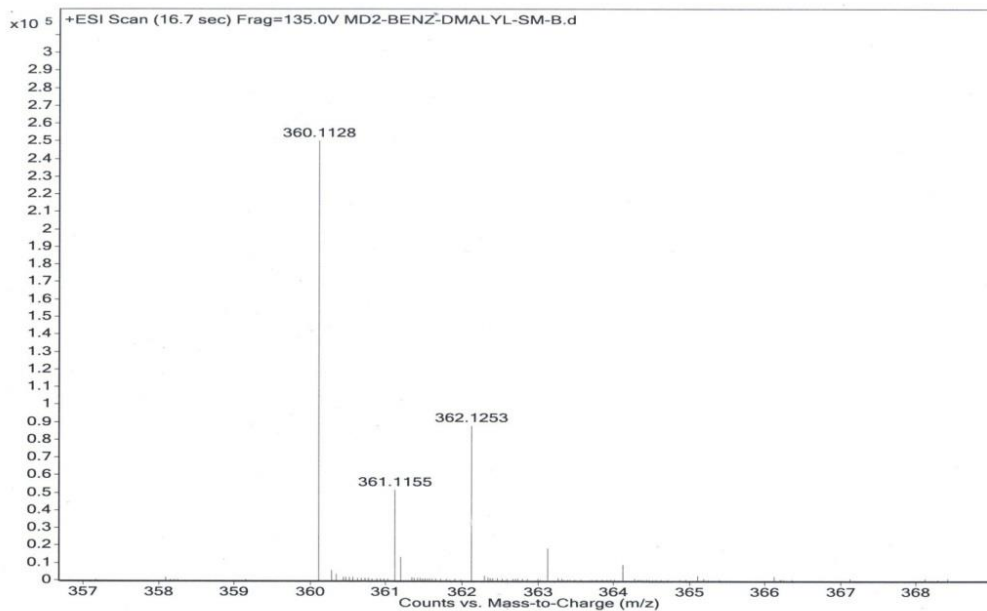

## HRMS Spectrum of 2a

|               |  |             |  |                 |  |                        |  |
|---------------|--|-------------|--|-----------------|--|------------------------|--|
| Sample Name   |  | Position    |  | Instrument Name |  | User Name              |  |
| Inj Vol       |  | InjPosition |  | SampleType      |  | IRM Calibration Status |  |
| Data Filename |  | ACQ Method  |  | Comment         |  | Acquired Time          |  |

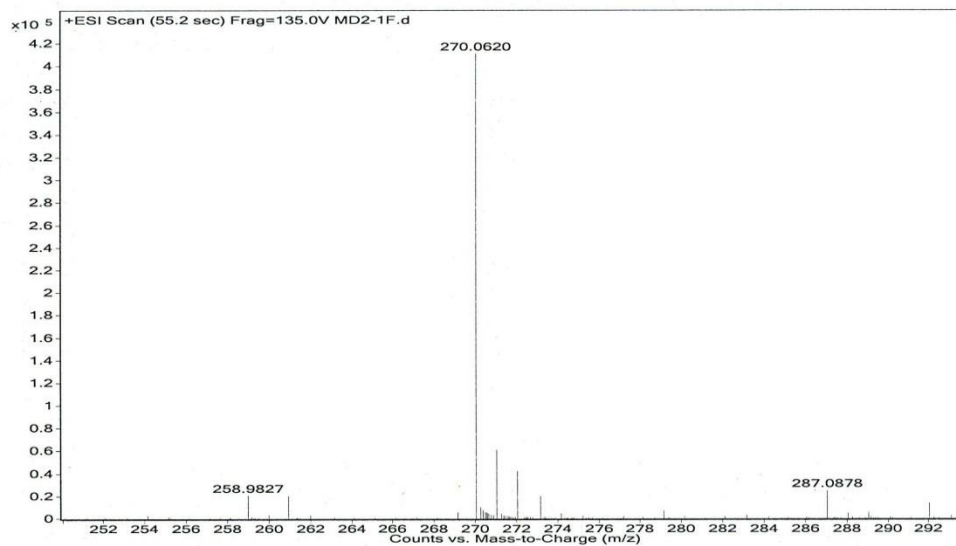

## HRMS Spectrum of **2b**

|               |                |             |        |                 |              |                        |                      |
|---------------|----------------|-------------|--------|-----------------|--------------|------------------------|----------------------|
| Sample Name   | MD2-CROTYL-F   | Position    | Vial 1 | Instrument Name | Instrument 1 | User Name              |                      |
| Inj Vol       | 0              | InjPosition |        | SampleType      | Sample       | IRM Calibration Status | Some Ions Missed     |
| Data Filename | MD2-CROTYL-F.d | ACQ Method  |        | Comment         |              | Acquired Time          | 3/8/2016 11:07:54 AM |

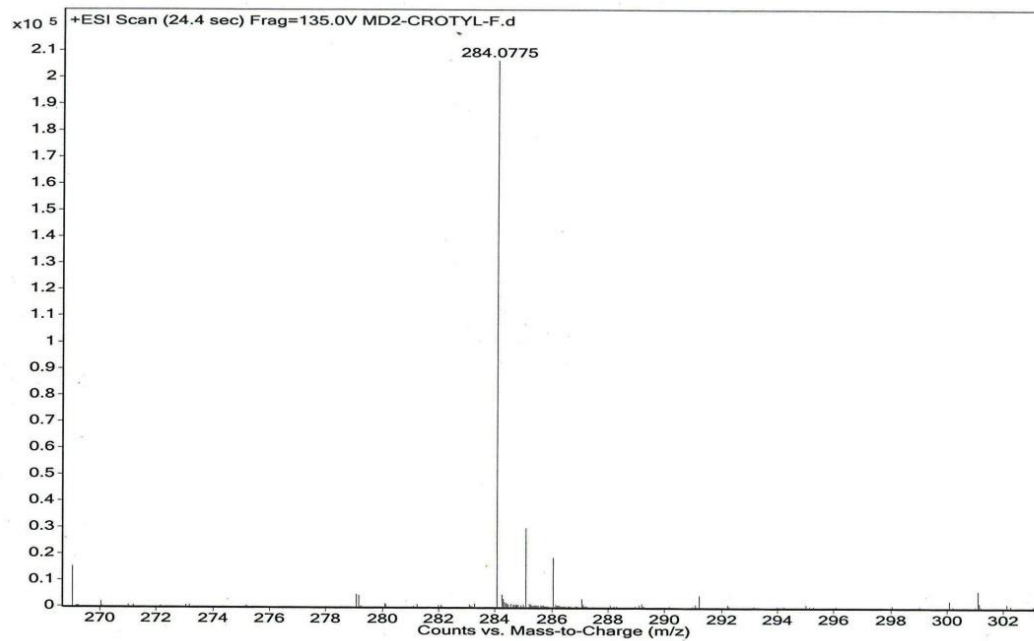

## HRMS Spectrum of **2c**

|               |                |             |        |                 |              |                        |                     |
|---------------|----------------|-------------|--------|-----------------|--------------|------------------------|---------------------|
| Sample Name   | MD2-DMALYL-F   | Position    | Vial 1 | Instrument Name | Instrument 1 | User Name              |                     |
| Inj Vol       | 0              | InjPosition |        | SampleType      | Sample       | IRM Calibration Status | Some Ions Missed    |
| Data Filename | MD2-DMALYL-F.d | ACQ Method  |        | Comment         |              | Acquired Time          | 3/4/2016 4:48:49 PM |

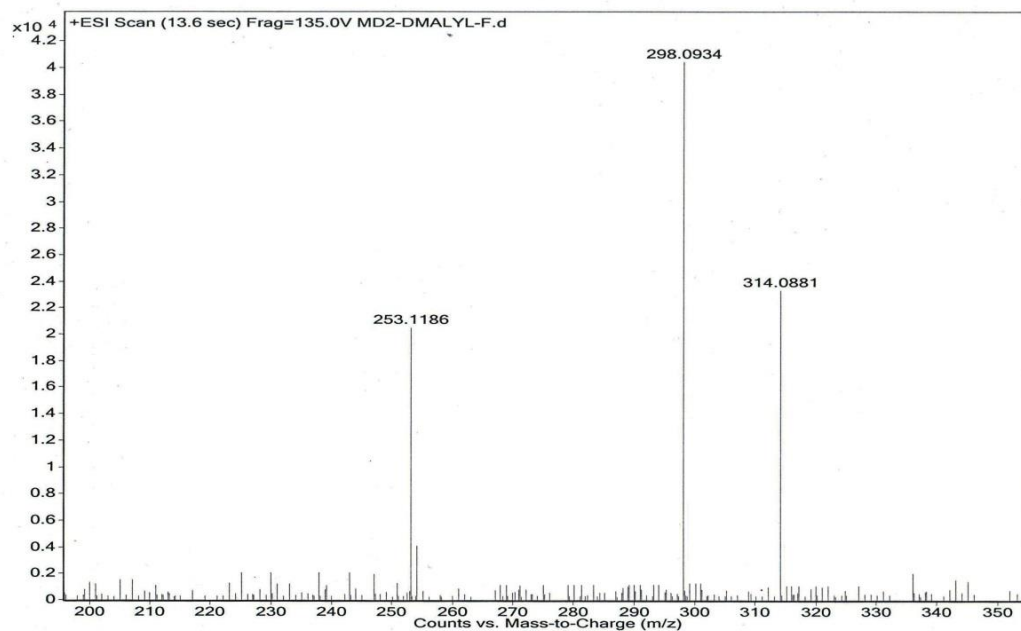

## HRMS Spectrum of **2d**

|               |               |             |        |                 |              |                        |                       |
|---------------|---------------|-------------|--------|-----------------|--------------|------------------------|-----------------------|
| Sample Name   | MD2-ALA-F-B   | Position    | Vial 1 | Instrument Name | Instrument 1 | User Name              |                       |
| Inj Vol       | 0             | InjPosition |        | SampleType      | Sample       | IRM Calibration Status | All Ions Missed       |
| Data Filename | MD2-ALA-F-B.d | ACQ Method  |        | Comment         |              | Acquired Time          | 7/21/2016 11:39:27 AM |

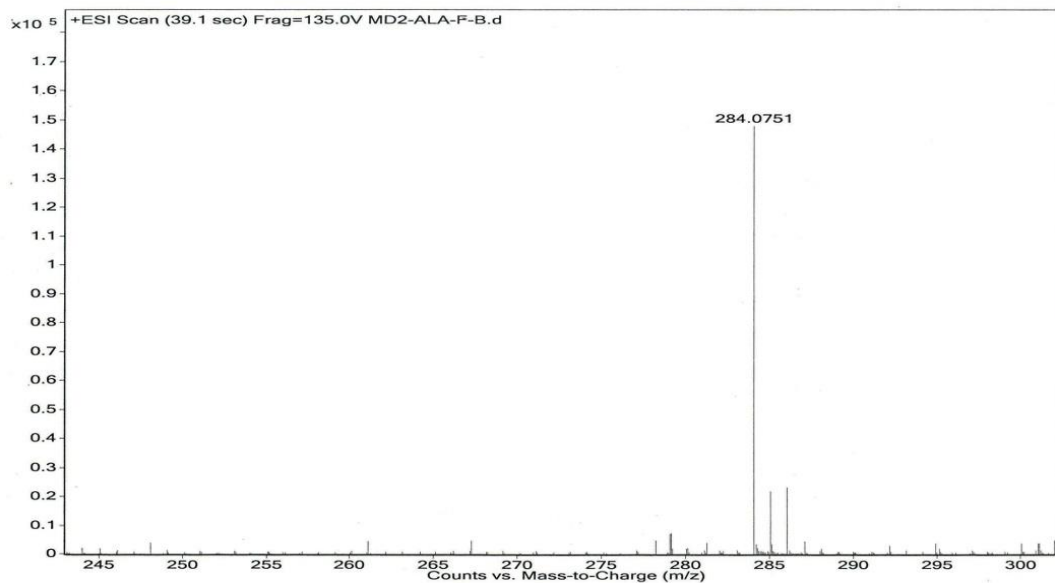

## HRMS Spectrum of **2e**

|               |  |             |  |                 |  |                        |  |
|---------------|--|-------------|--|-----------------|--|------------------------|--|
| Sample Name   |  | Position    |  | Instrument Name |  | User Name              |  |
| Inj Vol       |  | InjPosition |  | SampleType      |  | IRM Calibration Status |  |
| Data Filename |  | ACQ Method  |  | Comment         |  | Acquired Time          |  |

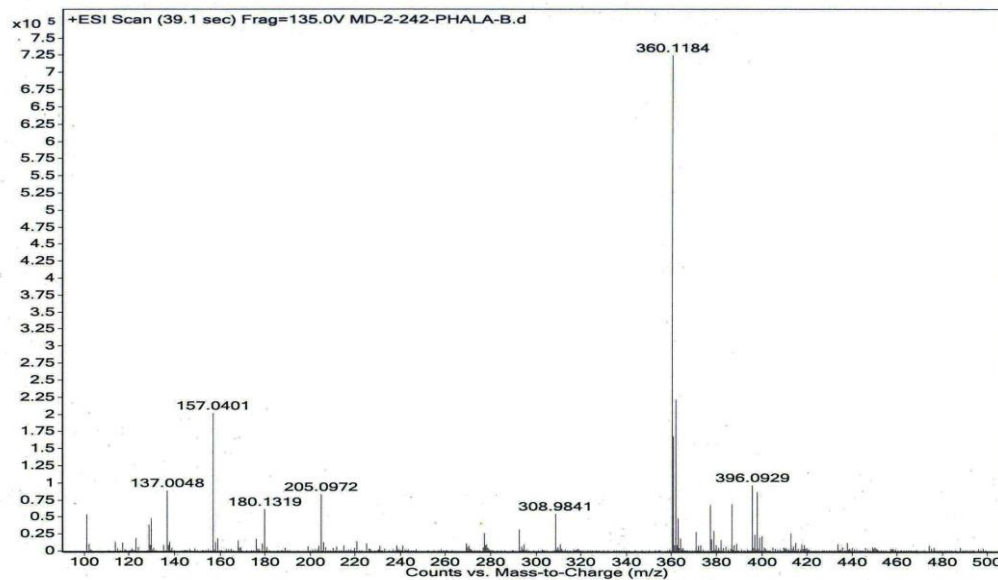

## HRMS Spectrum of 2f

|               |                 |             |             |                 |                                   |                        |                 |
|---------------|-----------------|-------------|-------------|-----------------|-----------------------------------|------------------------|-----------------|
| Sample Name   | Unavailable     | Position    | Unavailable | Instrument Name | Unavailable                       | User Name              | Unavailable     |
| Inj Vol       | Unavailable     | InjPosition | Unavailable | SampleType      | Unavailable                       | IRM Calibration Status | All Ions Missed |
| Data Filename | MD2-PHGLY-F-B.d | ACQ Method  |             | Comment         | Sample information is unavailable | Acquired Time          | Unavailable     |

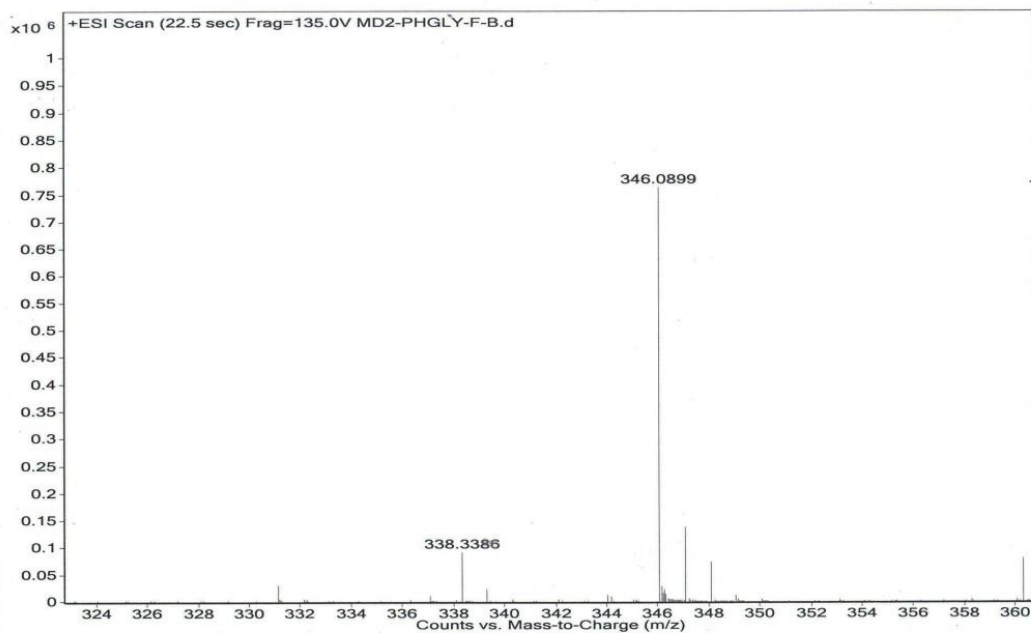

## HRMS Spectrum of 2g

|               |            |             |        |                 |              |                        |                      |
|---------------|------------|-------------|--------|-----------------|--------------|------------------------|----------------------|
| Sample Name   | MD2-4F-F   | Position    | Vial 1 | Instrument Name | Instrument 1 | User Name              |                      |
| Inj Vol       | 0          | InjPosition |        | SampleType      | Sample       | IRM Calibration Status | Some Ions Missed     |
| Data Filename | MD2-4F-F.d | ACQ Method  |        | Comment         |              | Acquired Time          | 3/8/2016 11:13:42 AM |

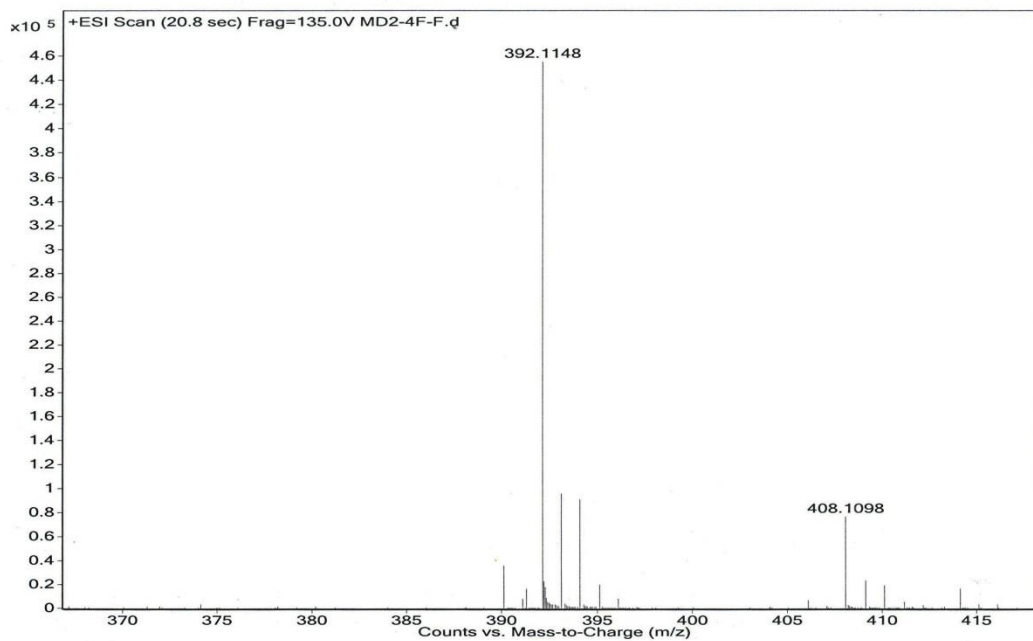



## HRMS Spectrum of 2h

|               |                |             |             |                 |                                   |                        |             |
|---------------|----------------|-------------|-------------|-----------------|-----------------------------------|------------------------|-------------|
| Sample Name   | Unavailable    | Position    | Unavailable | Instrument Name | Unavailable                       | User Name              | Unavailable |
| Inj Vol       | Unavailable    | InjPosition | Unavailable | SampleType      | Unavailable                       | IRM Calibration Status | Success     |
| Data Filename | AKS-UB-11OCT.d | ACQ Method  |             | Comment         | Sample information is unavailable | Acquired Time          | Unavailable |

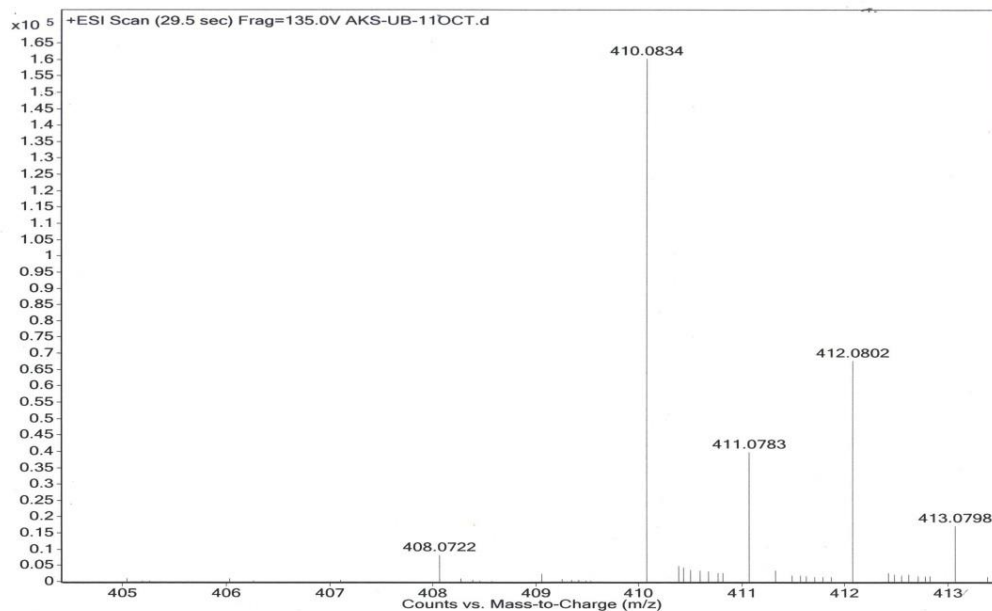

## HRMS Spectrum of 2i

|               |  |             |  |                 |  |                        |  |
|---------------|--|-------------|--|-----------------|--|------------------------|--|
| Sample Name   |  | Position    |  | Instrument Name |  | User Name              |  |
| Inj Vol       |  | InjPosition |  | SampleType      |  | IRM Calibration Status |  |
| Data Filename |  | ACQ Method  |  | Comment         |  | Acquired Time          |  |

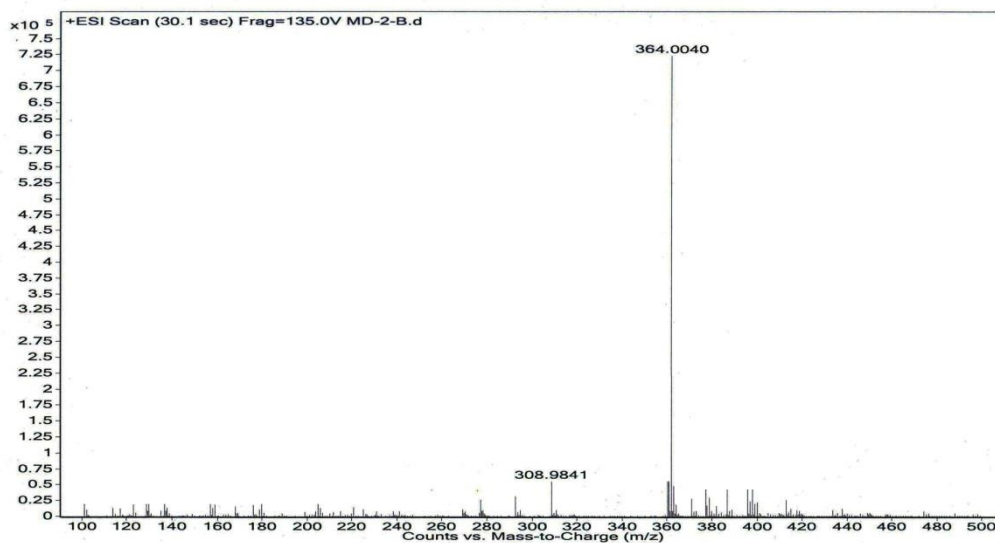

## HRMS Spectrum of 2k

|               |                  |             |             |                 |                                   |                        |                  |
|---------------|------------------|-------------|-------------|-----------------|-----------------------------------|------------------------|------------------|
| Sample Name   | Unavailable      | Position    | Unavailable | Instrument Name | Unavailable                       | User Name              | Unavailable      |
| Inj Vol       | Unavailable      | InjPosition | Unavailable | SampleType      | Unavailable                       | IRM Calibration Status | Some Ions Missed |
| Data Filename | MD2-BENZALYL-F.d | ACQ Method  |             | Comment         | Sample information is unavailable | Acquired Time          | Unavailable      |

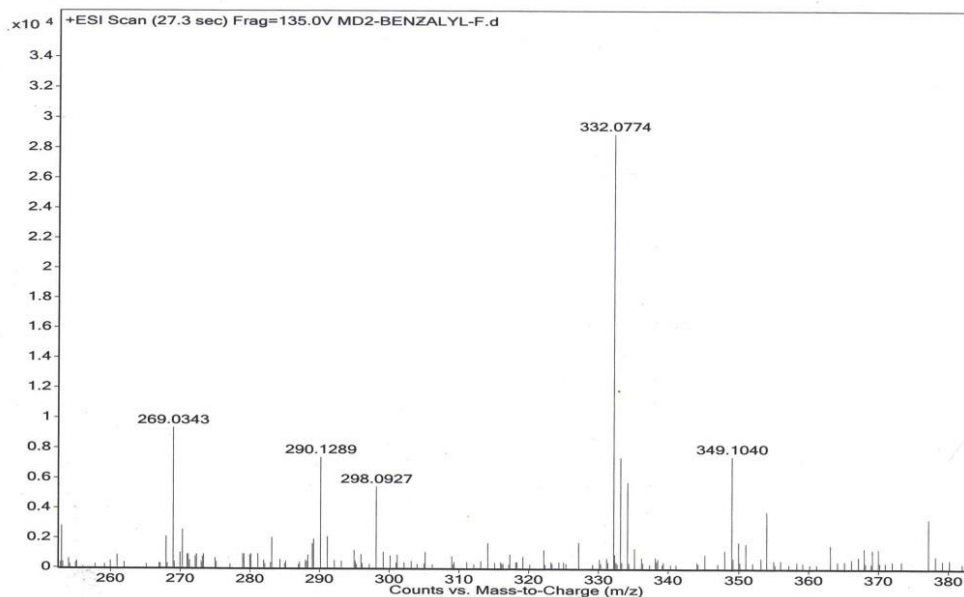

## HRMS Spectrum of 2l

|               |                    |             |        |                 |              |                        |                     |
|---------------|--------------------|-------------|--------|-----------------|--------------|------------------------|---------------------|
| Sample Name   | MD2-BENZDMALYL-F   | Position    | Vial 1 | Instrument Name | Instrument 1 | User Name              |                     |
| Inj Vol       | 0                  | InjPosition |        | SampleType      | Sample       | IRM Calibration Status | Some Ions Missed    |
| Data Filename | MD2-BENZDMALYL-F.d | ACQ Method  |        | Comment         |              | Acquired Time          | 3/4/2016 4:57:28 PM |

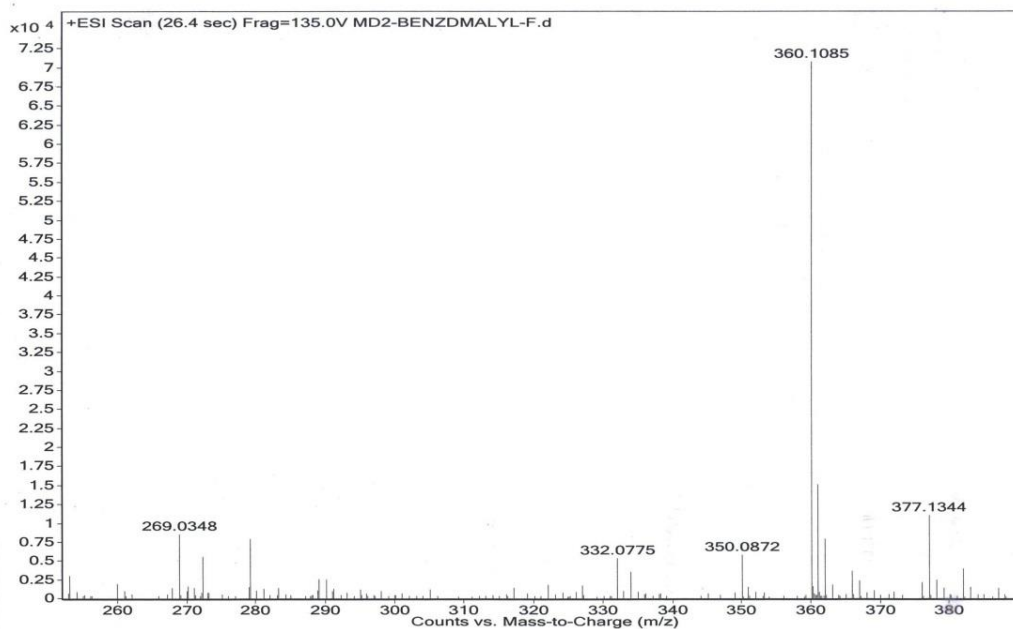

Supplement: c6ob01869f2.pdf [file c6ob01869f2.pdf]
